# Supplementary material for: A nomogram combining thoracic CT and tumor markers to predict the malignant grade of pulmonary nodules ≤3 cm in diameter
Source: Frontiers journal article supplement (doi:10.3389/fonc.2023.1196883), 2023-06-08
Supplement: Data_Sheet_1.ZIP [file Data_Sheet_1.ZIP]

## Sheet: Training
Outcome	Age	Gender	BMI	Smoking	CLD	PF	History_of_Cancer	Diameter	Diameter_M	Diameter_2vs1	Diameter_3vs1	CT.value	CT.value_M	CT.value_2vs1	CT.value_3vs1	CT.value_4vs1	CTR	CTR_J	Cavity	Lobulation	Spiculation	PT	VC	CEA	CEA_J	CYFRA21	CYFRA21_J	SCC	SCC_J	PROGRP	PROGRP_J	NSE	NSE_J
0	36	0	28.3	0	1	0	0	7	1	0	0	-490.25	2	1	0	0	0.16	0	0	0	0	1	0	4.81	1	19.51	1	13.4	1	3.98	0	2.42	0
1	60	1	23.5	0	0	0	0	30	3	0	1	-295.92	3	0	1	0	0.65	1	0	1	1	1	0	3.2	1	3.76	1	0.76	0	42.55	1	6.59	0
0	35	0	23.6	0	0	0	0	6	1	0	0	-706.5	1	0	0	0	0	0	0	0	0	0	0	0.8	0	1.02	0	0.85	0	31.3	0	6.6	0
0	47	0	21.6	0	1	0	0	14	2	1	0	-684.8	1	0	0	0	0	0	1	0	0	0	0	0.92	0	1.47	0	0.52	0	29.5	0	9.59	0
1	55	0	35.8	0	1	0	0	16	2	1	0	21.42	4	0	0	1	1	1	0	0	0	0	0	1.68	0	2.11	1	1.12	0	36	1	9.62	0
1	71	1	23.8	1	1	0	1	20	2	1	0	50.91	4	0	0	1	1	1	0	0	0	0	0	5.04	1	7.38	1	0.78	0	30.3	0	10.1	0
1	70	0	22.4	0	0	1	0	16	2	1	0	-381.97	3	0	1	0	0.29	1	0	1	1	0	0	2	1	2.38	1	1.01	0	51.87	1	10.3	0
0	52	0	20.3	0	0	0	0	8.8	1	0	0	-646.59	1	0	0	0	0	0	0	0	0	0	0	0.76	0	1.24	0	1.11	0	36.24	1	10.5	0
1	75	1	29.8	0	0	0	0	12	2	1	0	-464.66	2	1	0	0	0.24	0	0	0	1	0	1	3.86	1	2.27	1	0.81	0	36.3	1	10.5	0
1	49	0	24.6	0	0	0	0	26	3	0	1	-512.38	2	1	0	0	0.15	0	0	0	0	1	1	2.67	1	1.09	0	0.67	0	23.8	0	10.6	0
1	58	1	26.8	1	0	0	0	28	3	0	1	-204.57	3	0	1	0	0.78	1	0	1	1	1	0	0.93	0	1.66	0	0.72	0	15	0	11	0
1	49	0	24.6	0	0	0	1	12	2	1	0	-421.13	2	1	0	0	0.22	0	0	0	0	0	0	2.18	1	0.53	0	0.63	0	17.9	0	11.1	0
0	30	0	22.9	0	0	0	0	9.2	1	0	0	-635.59	1	0	0	0	0	0	0	0	0	0	1	2.05	1	1.33	0	0.8	0	55	1	11.2	0
1	63	1	32	1	1	0	0	20	2	1	0	-285.52	3	0	1	0	0.51	1	0	1	0	1	1	1.68	0	2.95	1	2.42	1	65.83	1	11.3	0
1	47	0	29.6	0	0	0	0	28	3	0	1	33.25	4	0	0	1	1	1	1	1	1	1	0	3.88	1	1.96	1	0.4	0	32.4	0	11.3	0
0	74	1	17.8	1	0	0	0	16	2	1	0	-318.98	3	0	1	0	0.33	1	1	1	1	1	0	2.23	1	1.5	0	1.59	0	58.44	1	11.6	0
1	61	1	24.6	0	1	0	0	23	3	0	1	34.77	4	0	0	1	1	1	0	1	1	1	0	1.48	0	2.18	1	1.55	0	38.51	1	11.7	0
0	34	0	24	0	0	1	0	9	1	0	0	-655.68	1	0	0	0	0	0	0	0	0	0	1	1.45	0	0.85	0	1.25	0	22.4	0	11.7	0
1	61	1	28.7	0	0	1	0	15	2	1	0	-504.34	2	1	0	0	0.15	0	0	0	0	0	1	2.11	1	2.5	1	1.36	0	37.5	1	11.7	0
0	52	1	23.9	0	0	1	0	7.5	1	0	0	-476.66	2	1	0	0	0.17	0	0	0	0	0	0	1.46	0	1.69	0	0.53	0	43.5	1	11.8	0
1	53	0	25.8	0	0	1	0	13	2	1	0	-93.33	4	0	0	1	0.93	1	0	1	1	1	0	0.76	0	1.87	1	0.84	0	30.7	0	11.9	0
1	69	0	25.3	0	1	1	0	10	1	0	0	-461.09	2	1	0	0	0.22	0	0	0	1	0	1	1.16	0	1.47	0	0.58	0	41	1	12	0
0	52	1	26.4	1	0	0	0	9	1	0	0	-551.93	2	1	0	0	0	0	0	0	0	1	0	3.88	1	0.8	0	0.75	0	35.06	1	12.1	0
0	68	1	21.4	1	1	0	0	13	2	1	0	-693.46	1	0	0	0	0	0	0	0	0	0	0	4.14	1	1.53	0	1.08	0	35.7	1	12.1	0
0	49	0	23.5	0	0	0	0	7	1	0	0	-587.55	2	1	0	0	0	0	0	0	0	0	0	2.21	1	2.79	1	0.76	0	25.3	0	12.1	0
1	63	0	23.6	0	0	0	0	30	3	0	1	41.18	4	0	0	1	1	1	1	1	1	1	1	2.99	1	1.75	0	0.47	0	57.76	1	12.3	0
1	41	0	24.6	0	0	1	0	23	3	0	1	22.93	4	0	0	1	1	1	1	1	1	1	1	1.75	0	1.73	0	0.96	0	38.4	1	12.3	0
0	54	0	25.5	0	0	0	0	7	1	0	0	-686.11	1	0	0	0	0	0	0	0	1	0	0	0.63	0	1.28	0	0.53	0	33.49	1	12.4	0
1	78	1	21.6	1	0	1	0	20	2	1	0	17.31	4	0	0	1	1	1	0	1	1	0	0	2.9	1	1.77	0	0.7	0	38.31	1	12.4	0
0	72	0	24.8	0	0	1	0	11	2	1	0	-701.86	1	0	0	0	0	0	0	0	0	0	0	2.46	1	1.42	0	0.94	0	46.8	1	12.5	0
1	49	1	25.6	0	0	0	0	19	2	1	0	-302.24	3	0	1	0	0.73	1	0	1	1	1	1	6.82	1	3.89	1	2.11	1	108	1	12.5	0
0	48	0	29.2	0	0	0	0	9	1	0	0	-703.21	1	0	0	0	0	0	0	0	0	0	0	2.52	1	2.41	1	0.61	0	34.4	1	12.5	0
1	52	0	28.7	0	0	0	0	25	3	0	1	-128.82	4	0	0	1	0.82	1	0	1	0	1	0	1.26	0	2.2	1	1.02	0	63.39	1	12.7	0
0	66	0	21.9	0	0	1	0	16	2	1	0	-754.39	1	0	0	0	0	0	0	0	1	1	1	6.32	1	3.01	1	1.35	0	52.53	1	12.7	0
1	69	1	23.1	0	0	1	0	23	3	0	1	27.49	4	0	0	1	1	1	0	1	1	1	0	2.92	1	2.34	1	0.72	0	78	1	12.8	0
1	67	1	21.9	0	0	0	0	30	3	0	1	-440.71	2	1	0	0	0.22	0	1	1	1	1	0	1.1	0	1.57	0	2.27	1	47.07	1	12.8	0
0	34	0	23.6	0	0	1	0	7	1	0	0	-573.31	2	1	0	0	0	0	0	0	0	1	0	1.81	0	1.37	0	1.43	0	36.9	1	12.8	0
1	56	0	23.1	0	0	1	0	10	1	0	0	-579.45	2	1	0	0	0	0	0	1	0	0	0	0.95	0	1.95	1	1.16	0	71.28	1	12.9	0
1	44	0	23.2	0	0	1	0	25	3	0	1	-367.26	3	0	1	0	0.28	1	1	1	0	1	1	3.17	1	1.88	1	1.33	0	42.49	1	12.9	0
0	52	0	23.4	0	0	0	0	10	1	0	0	-672.73	1	0	0	0	0	0	0	0	0	0	0	2.08	1	3.09	1	1.51	0	49.09	1	13	0
1	57	0	22.8	0	0	1	0	18	2	1	0	28.24	4	0	0	1	1	1	0	1	0	1	0	1.71	0	1.45	0	1.34	0	46.7	1	13	0
1	51	0	20.3	0	0	1	0	30	3	0	1	41.6	4	0	0	1	1	1	0	1	1	1	0	10.1	1	1.54	0	0.93	0	53.24	1	13	0
0	60	0	21	0	0	0	1	13	2	1	0	-268.94	3	0	1	0	0.56	1	0	0	1	1	1	3.49	1	2.73	1	0.98	0	66.22	1	13.1	0
0	67	0	24.9	0	0	0	0	12	2	1	0	-610.35	1	0	0	0	0	0	0	0	0	0	0	2.12	1	2.93	1	0.77	0	48.9	1	13.4	0
0	56	1	22.5	0	0	0	0	11	2	1	0	-427.29	2	1	0	0	0.21	0	0	0	0	0	1	0.64	0	1.91	1	1.07	0	35.1	1	13.4	0
0	56	0	28.8	0	0	0	0	12	2	1	0	-662.74	1	0	0	0	0	0	0	0	0	1	0	1.73	0	1.31	0	0.72	0	43.8	1	13.4	0
1	59	0	24.3	0	0	0	0	30	3	0	1	-122.48	4	0	0	1	0.79	1	0	1	0	1	1	3.63	1	3.75	1	1.28	0	58.77	1	13.4	0
0	45	0	25	0	0	0	0	8	1	0	0	-678.31	1	0	0	0	0	0	0	0	0	1	1	1.32	0	1.56	0	1.31	0	58.48	1	13.4	0
1	45	0	23.9	0	0	0	0	24	3	0	1	-496.57	2	1	0	0	0.18	0	0	1	1	1	1	1.49	0	0.84	0	0.92	0	22.86	0	13.5	0
0	36	0	22.5	0	0	0	0	8.8	1	0	0	-534.05	2	1	0	0	0	0	0	0	1	1	0	1.28	0	2.04	1	0.92	0	54.95	1	13.5	0
0	57	0	30.4	0	0	1	0	9	1	0	0	-436.13	2	1	0	0	0.21	0	1	0	0	1	0	1.54	0	1.41	0	0.73	0	46.4	1	13.6	0
0	41	0	25.2	0	0	0	0	16	2	1	0	-623.25	1	0	0	0	0	0	0	0	0	0	0	0.58	0	2.16	1	2.15	1	51.06	1	13.6	0
0	36	0	20.8	0	0	0	0	5.5	1	0	0	-532.83	2	1	0	0	0	0	0	0	0	0	0	0.8	0	1.76	0	0.52	0	25.1	0	13.6	0
1	59	0	25.3	0	0	1	0	16	2	1	0	-64.84	4	0	0	1	0.88	1	1	0	0	1	1	1.06	0	1.48	0	0.35	0	39.1	1	13.7	0
0	63	1	24.2	1	1	1	0	15	2	1	0	-412.89	2	1	0	0	0.25	0	0	0	1	1	0	6	1	4.23	1	0.93	0	49.92	1	13.7	0
0	29	0	23.9	0	0	1	1	7	1	0	0	-642.05	1	0	0	0	0	0	0	0	0	0	0	0.84	0	1.16	0	1.24	0	29.83	0	13.7	0
1	53	0	30.4	0	0	1	1	26	3	0	1	-411.16	2	1	0	0	0.29	1	0	1	1	1	0	3.81	1	2.1	1	0.78	0	23.6	0	13.8	0
0	37	0	25.1	0	0	0	1	16	2	1	0	-613.59	1	0	0	0	0	0	0	0	0	0	1	2.31	1	1.11	0	0.77	0	31.6	0	13.8	0
0	58	1	25.8	1	1	1	0	16	2	1	0	-709.54	1	0	0	0	0	0	0	0	0	0	0	3.12	1	1.57	0	0.71	0	35.7	1	13.8	0
1	64	0	25.9	1	1	1	1	30	3	0	1	-324.86	3	0	1	0	0.37	1	1	1	0	0	0	2.52	1	2.13	1	0.79	0	40.99	1	13.8	0
0	50	1	21.6	0	0	0	0	10	1	0	0	-759.02	1	0	0	0	0	0	0	0	0	0	0	2.15	1	1.34	0	1.72	1	44.83	1	13.8	0
0	39	0	22.8	0	0	0	0	16	2	1	0	-522.53	2	1	0	0	0	0	0	0	0	0	1	0.99	0	0.97	0	1.21	0	28.1	0	13.8	0
1	55	0	25.2	0	0	0	1	14	2	1	0	-409.88	2	1	0	0	0.33	1	1	1	0	0	0	2.34	1	1.52	0	1.41	0	52.63	1	13.9	0
0	40	0	30.4	0	0	1	0	15	2	1	0	-178.58	4	0	0	1	0.86	1	0	1	0	0	0	0.92	0	2.02	1	1.21	0	33.62	1	13.9	0
0	71	0	29	0	0	0	0	8.6	1	0	0	-540.1	2	1	0	0	0	0	0	0	0	0	0	3.11	1	3.15	1	2.59	1	61.72	1	13.9	0
0	51	1	23.4	0	0	0	0	6	1	0	0	-626.63	1	0	0	0	0	0	0	0	0	0	0	0.83	0	1.43	0	1.22	0	64.9	1	14	0
0	59	0	26.1	0	0	0	0	7	1	0	0	-685.18	1	0	0	0	0	0	0	0	0	0	0	3.57	1	2.63	1	0.49	0	56.6	1	14	0
0	65	1	25	0	0	0	0	14.7	2	1	0	-542.36	2	1	0	0	0	0	0	1	1	0	0	1.45	0	1.57	0	2.06	1	96.8	1	14	0
1	56	0	32.8	0	0	0	0	24	3	0	1	-148.42	4	0	0	1	0.85	1	0	1	1	1	0	8.31	1	2.19	1	0.49	0	29.07	0	14	0
0	48	0	27.3	0	0	0	0	6	1	0	0	-576.84	2	1	0	0	0	0	0	0	0	0	0	1.54	0	1.08	0	0.81	0	36.46	1	14	0
1	58	0	29.6	0	0	1	0	10	1	0	0	-593.43	2	1	0	0	0	0	0	0	0	0	0	2.77	1	2.22	1	1.29	0	55	1	14	0
1	72	0	23.5	1	0	0	0	25	3	0	1	-177.88	4	0	0	1	0.77	1	0	1	1	1	1	2.05	1	1.16	0	0.33	0	36.5	1	14.1	0
0	73	0	21.5	0	1	0	0	19	2	1	0	-446.79	2	1	0	0	0.25	0	0	1	1	0	0	5.52	1	1.47	0	0.81	0	72.4	1	14.1	0
0	50	1	22.8	0	0	1	1	11	2	1	0	-482.44	2	1	0	0	0.15	0	0	1	0	0	1	2.14	1	1.54	0	1.11	0	25.71	0	14.1	0
0	58	0	24.3	0	0	0	1	8	1	0	0	-589.13	2	1	0	0	0	0	0	0	1	1	0	1.14	0	3.91	1	0.59	0	63.9	1	14.1	0
1	66	0	29.4	0	0	1	1	20	2	1	0	-352.73	3	0	1	0	0.36	1	1	1	0	0	0	2.29	1	1.87	1	1.44	0	46.5	1	14.2	0
0	56	0	20.4	0	0	1	0	7.3	1	0	0	-567.39	2	1	0	0	0.06	0	0	0	0	0	0	1.38	0	1.32	0	0.74	0	40	1	14.3	0
1	75	0	29	0	0	0	0	20	2	1	0	-372.47	3	0	1	0	0.26	0	0	0	1	1	0	2.72	1	3.71	1	0.84	0	67	1	14.3	0
1	61	0	25.4	0	1	1	1	11	2	1	0	-291.38	3	0	1	0	0.36	1	0	0	1	0	0	2.42	1	1.84	1	0.72	0	56.3	1	14.3	0
1	65	0	26.8	0	1	1	0	11	2	1	0	-302.52	3	0	1	0	0.62	1	0	0	1	0	1	0.35	0	1.24	0	0.7	0	26.7	0	14.3	0
0	65	1	22.7	1	0	0	0	15	2	1	0	-521.93	2	1	0	0	0	0	1	1	1	1	0	3.12	1	6.06	1	1.78	1	43	1	14.3	0
1	64	0	25.6	0	0	0	0	29	3	0	1	-147.14	4	0	0	1	0.76	1	0	1	0	1	0	5.3	1	0.65	0	0.33	0	17.4	0	14.3	0
1	76	1	24.9	1	1	1	0	18	2	1	0	17.96	4	0	0	1	1	1	1	0	1	0	1	1.82	0	1.53	0	1.13	0	25	0	14.4	0
1	64	0	22.8	0	0	0	1	18	2	1	0	-198.9	4	0	0	1	0.79	1	0	0	1	0	1	8.29	1	2.32	1	1.13	0	52.99	1	14.5	0
0	48	0	24.2	0	0	1	0	10	1	0	0	-634.65	1	0	0	0	0	0	0	0	0	0	0	2.27	1	1.8	1	0.85	0	34.9	1	14.5	0
1	59	1	22.8	1	1	1	0	20	2	1	0	-15.85	4	0	0	1	1	1	0	0	1	1	0	10.7	1	2.86	1	1.81	1	28.36	0	14.5	0
0	47	1	26.1	0	0	0	0	11	2	1	0	-119.86	4	0	0	1	0.79	1	0	1	0	0	0	2.21	1	1.52	0	0.6	0	31.04	0	14.6	0
1	45	0	24.8	0	0	1	0	24	3	0	1	22.29	4	0	0	1	1	1	0	0	0	0	0	3.22	1	1.27	0	1.13	0	17.7	0	14.6	0
1	63	1	31.2	0	0	0	0	30	3	0	1	42.21	4	0	0	1	1	1	0	1	1	1	1	5.67	1	1.82	1	3.27	1	36.59	1	14.7	0
0	55	1	29.4	0	0	0	0	7.5	1	0	0	-681.31	1	0	0	0	0	0	0	0	0	0	0	1.61	0	0.84	0	0.81	0	31.2	0	14.7	0
1	45	0	21	0	0	0	0	13	2	1	0	-408.81	2	1	0	0	0.22	0	0	1	0	0	1	2.19	1	1.96	1	0.62	0	45.67	1	14.7	0
1	63	1	23.5	0	0	1	0	12	2	1	0	-276.06	3	0	1	0	0.74	1	0	1	1	0	1	14.9	1	2.73	1	0.48	0	56.27	1	14.7	0
0	66	0	25.5	0	0	0	0	14	2	1	0	-618.55	1	0	0	0	0	0	0	0	1	0	0	1.76	0	2.15	1	0.58	0	33.48	1	14.8	0
0	48	1	26.4	0	0	0	0	10.8	2	1	0	-750.48	1	0	0	0	0	0	1	0	1	0	0	0.47	0	1.84	1	1.35	0	35	1	14.8	0
0	61	1	28.2	1	0	1	0	15	2	1	0	-690.36	1	0	0	0	0	0	0	0	1	0	0	4.02	1	3.15	1	2.71	1	41.98	1	14.8	0
0	68	0	24.6	0	1	1	0	25	3	0	1	-608.71	1	0	0	0	0	0	0	0	0	1	0	1.63	0	3.33	1	1.48	0	52.53	1	14.9	0
0	64	0	21.9	0	0	0	0	6.8	1	0	0	-670.38	1	0	0	0	0	0	0	0	0	0	0	2.31	1	1.22	0	0.73	0	44.9	1	14.9	0
0	71	1	26.6	1	0	0	0	13	2	1	0	-605.05	1	0	0	0	0	0	0	0	0	0	1	4.82	1	5.51	1	1.14	0	70.63	1	15	0
1	67	0	36.6	0	0	0	0	14	2	1	0	-90.04	4	0	0	1	0.91	1	0	0	0	0	0	0.73	0	1.82	1	1.81	1	42	1	15	0
0	52	0	24.9	0	0	0	0	10	1	0	0	-517.73	2	1	0	0	0	0	0	1	1	0	0	1.77	0	1.82	1	0.73	0	51.88	1	15	0
0	55	0	22.4	0	0	0	0	30	3	0	1	-434.42	2	1	0	0	0.23	0	0	0	1	1	0	1.58	0	3.58	1	0.83	0	39.02	1	15	0
0	46	0	23	0	0	1	1	14	2	1	0	-564.83	2	1	0	0	0.11	0	1	1	1	0	0	0.57	0	1.99	1	1.28	0	42.92	1	15	0
1	59	0	24.8	0	0	0	0	28	3	0	1	-641.03	1	0	0	0	0	0	0	0	1	0	0	2.89	1	2.44	1	0.64	0	41	1	15.1	0
1	65	0	26.4	0	0	1	1	14	2	1	0	-554.62	2	1	0	0	0	0	0	0	1	0	1	1.21	0	2.28	1	0.47	0	50.1	1	15.1	0
1	63	0	20.6	0	0	1	1	28	3	0	1	25.32	4	0	0	1	1	1	1	1	1	1	0	1.91	0	1.54	0	0.67	0	31.9	0	15.1	0
0	68	0	33.6	0	0	1	1	19	2	1	0	-622.72	1	0	0	0	0	0	0	0	0	0	0	1.59	0	1.49	0	0.47	0	48.3	1	15.1	0
0	64	1	26.1	0	0	0	0	17	2	1	0	-540.94	2	1	0	0	0	0	0	0	0	1	1	2.34	1	1.78	0	0.74	0	49.58	1	15.1	0
0	40	0	24.6	0	0	1	0	6.5	1	0	0	-678.56	1	0	0	0	0	0	0	0	0	0	0	1.08	0	1.55	0	0.69	0	30.2	0	15.1	0
0	63	0	24	0	1	0	0	11	2	1	0	-653.12	1	0	0	0	0	0	0	1	0	0	1	3.18	1	1.79	1	1.07	0	54.55	1	15.2	0
1	61	0	26	0	0	0	0	13	2	1	0	-193.96	4	0	0	1	0.79	1	0	1	0	0	0	2.92	1	1.94	1	1.01	0	36.6	1	15.2	0
1	63	0	19.5	0	0	1	1	28	3	0	1	11.91	4	0	0	1	1	1	0	0	1	1	1	102	1	2.25	1	0.56	0	39.09	1	15.2	0
0	45	0	20.2	0	0	0	0	12	2	1	0	-407.34	2	1	0	0	0.27	1	1	0	0	0	0	1.01	0	0.75	0	1.45	0	34.8	1	15.2	0
0	69	0	21.4	0	0	0	0	10	1	0	0	-548.46	2	1	0	0	0	0	0	0	0	0	0	1.7	0	0.97	0	0.72	0	62.8	1	15.3	0
0	53	0	24.8	0	0	1	0	22	3	0	1	-781.84	1	0	0	0	0	0	1	1	0	0	0	2.05	1	1.11	0	0.95	0	28.25	0	15.3	0
0	54	0	19.9	0	0	0	0	15	2	1	0	-452.81	2	1	0	0	0.24	0	0	1	0	1	1	1.14	0	1.37	0	0.5	0	51.45	1	15.3	0
1	60	1	21.5	1	1	0	0	18	2	1	0	43.16	4	0	0	1	1	1	0	1	1	0	1	2.02	1	1.62	0	1.34	0	35.7	1	15.3	0
0	56	0	18.7	0	0	0	0	8	1	0	0	-606.85	1	0	0	0	0	0	0	1	0	0	0	1.21	0	2.66	1	0.86	0	46.81	1	15.3	0
0	59	1	26.6	0	0	0	0	11	2	1	0	-669.03	1	0	0	0	0	0	0	0	0	0	0	3	1	1.16	0	1.85	1	58.2	1	15.3	0
1	58	0	29	0	0	1	0	10	1	0	0	-425.67	2	1	0	0	0.27	1	0	0	0	1	0	2.03	1	1.28	0	1.02	0	38.81	1	15.4	0
1	68	0	30.5	0	0	0	0	28	3	0	1	20.58	4	0	0	1	1	1	0	1	1	1	0	5.26	1	2.25	1	0.55	0	54.56	1	15.4	0
0	39	0	21.5	0	0	0	1	9	1	0	0	-710.74	1	0	0	0	0	0	1	0	0	0	0	1.06	0	1.54	0	1.26	0	34.7	1	15.4	0
0	40	0	24.8	0	0	0	0	7	1	0	0	-654.76	1	0	0	0	0	0	0	0	0	0	0	0.4	0	2.6	1	1.61	0	23.8	0	15.5	0
1	53	0	24.3	0	0	0	0	13	2	1	0	-531.47	2	1	0	0	0	0	1	0	1	0	0	1.11	0	2.09	1	0.48	0	34.5	1	15.5	0
0	58	0	25.1	0	0	1	1	23	3	0	1	-423.81	2	1	0	0	0.26	0	1	0	1	0	1	1.32	0	2	1	0.46	0	48.73	1	15.5	0
0	48	0	23.2	0	0	1	0	10	1	0	0	-711.5	1	0	0	0	0	0	0	0	1	0	0	1.82	0	2.05	1	0.54	0	27.36	0	15.5	0
0	41	0	22.4	0	0	1	0	15	2	1	0	-713.08	1	0	0	0	0	0	0	0	0	0	0	0.38	0	1.66	0	0.69	0	34.4	1	15.5	0
0	66	0	21.4	0	0	0	0	27	3	0	1	-275.85	3	0	1	0	0.58	1	1	0	1	1	0	1.6	0	1.66	0	0.47	0	41.7	1	15.6	0
0	45	0	22.8	0	0	1	0	29	3	0	1	-425.83	2	1	0	0	0.25	0	0	0	0	1	0	2.16	1	1.67	0	0.98	0	29.9	0	15.6	0
0	54	0	26.7	0	0	1	0	21	3	0	1	-379.31	3	0	1	0	0.21	0	0	1	1	0	0	2.97	1	1.49	0	0.49	0	80.05	1	15.6	0
0	55	0	20.4	0	0	1	1	12	2	1	0	-653.53	1	0	0	0	0	0	0	0	0	1	0	4.65	1	1.99	1	0.62	0	70.42	1	15.6	0
1	45	0	22.7	0	0	0	0	15	2	1	0	-457.05	2	1	0	0	0.21	0	0	1	1	1	0	1.03	0	2.18	1	1.8	1	27.2	0	15.6	0
0	55	0	26.8	0	0	1	0	18	2	1	0	-702.26	1	0	0	0	0	0	0	0	1	0	0	2.13	1	2.03	1	0.81	0	45.82	1	15.7	0
1	70	0	23.4	0	0	0	1	13	2	1	0	-318.21	3	0	1	0	0.73	1	0	0	1	0	0	2.7	1	2.48	1	1.28	0	48.3	1	15.7	0
0	66	1	28.3	1	0	1	0	10	1	0	0	-634.91	1	0	0	0	0	0	0	0	1	0	1	3.22	1	2.08	1	1.43	0	41.09	1	15.7	0
0	52	0	26.1	0	0	0	0	7	1	0	0	-585.37	2	1	0	0	0	0	0	0	1	0	0	1.59	0	2.21	1	0.75	0	47.28	1	15.7	0
0	58	0	20.8	0	0	0	0	5	1	0	0	-651.84	1	0	0	0	0	0	0	0	1	0	0	2.44	1	1.74	0	1.53	0	68.8	1	15.7	0
0	64	0	25.7	0	0	0	0	29	3	0	1	-181.88	4	0	0	1	0.82	1	1	0	1	1	0	1.31	0	1.82	1	0.8	0	41.3	1	15.7	0
0	41	0	32	0	0	0	0	8	1	0	0	-655.81	1	0	0	0	0	0	0	0	0	0	0	1.91	0	1.16	0	1.5	0	33.56	1	15.7	0
1	40	1	28.2	1	0	1	0	15	2	1	0	-18.35	4	0	0	1	0.98	1	0	1	1	1	1	1.75	0	1.99	1	1.41	0	48.7	1	15.8	0
1	52	1	20	0	0	1	0	30	3	0	1	-527.69	2	1	0	0	0.18	0	1	0	0	1	0	7.29	1	4.4	1	1.2	0	62.25	1	15.8	0
1	56	1	27.4	0	0	0	0	23	3	0	1	36.28	4	0	0	1	1	1	0	1	1	0	0	4.19	1	1.5	0	1.02	0	27.29	0	15.8	0
1	50	0	25.3	0	0	0	1	8	1	0	0	-402.84	2	1	0	0	0	0	0	0	0	0	1	1.33	0	2.41	1	1.3	0	27.2	0	15.8	0
0	51	0	21.8	0	0	1	0	11	2	1	0	-614.55	1	0	0	0	0	0	0	0	0	0	0	0.62	0	2.38	1	0.79	0	43.4	1	15.8	0
0	55	0	19.8	0	0	1	0	9	1	0	0	-614.35	1	0	0	0	0	0	0	0	0	0	0	2.78	1	1.54	0	1.16	0	56.34	1	15.8	0
1	69	0	25.9	0	1	1	0	13	2	1	0	-371.72	3	0	1	0	0.24	0	0	0	0	0	0	2.4	1	3.85	1	0.78	0	61.4	1	15.8	0
1	58	1	26.5	1	1	0	0	18	2	1	0	-428.54	2	1	0	0	0.2	0	0	0	1	0	0	2.54	1	0.73	0	1.71	1	33.6	1	15.8	0
0	41	0	25.3	0	0	0	0	7	1	0	0	-628.63	1	0	0	0	0	0	0	0	0	0	0	1.3	0	1.37	0	1.95	1	35.38	1	15.8	0
0	57	0	21.9	0	0	0	0	12	2	1	0	-606.85	1	0	0	0	0	0	0	0	0	0	0	1.11	0	2.12	1	0.73	0	56.3	1	15.9	0
1	65	1	26.1	1	0	0	1	10	1	0	0	-509.56	2	1	0	0	0	0	0	0	0	0	0	2.19	1	2.45	1	1.61	0	28.04	0	15.9	0
1	52	0	24.7	0	0	0	1	15	2	1	0	32.18	4	0	0	1	1	1	1	1	1	1	0	1.98	1	1.86	1	0.71	0	29.63	0	15.9	0
0	54	1	24	0	0	0	0	17	2	1	0	-552.02	2	1	0	0	0	0	0	0	0	0	1	3.95	1	2.28	1	1.14	0	53.54	1	16	0
0	58	0	21.1	0	0	1	0	18	2	1	0	17.26	4	0	0	1	1	1	0	1	1	1	0	1.24	0	0.58	0	0.79	0	23.08	0	16	0
0	65	0	23.5	0	1	0	0	15	2	1	0	-152.05	4	0	0	1	0.83	1	1	1	0	1	0	0.88	0	1.37	0	0.49	0	20.28	0	16	0
1	64	0	21.8	0	1	1	0	15	2	1	0	11.54	4	0	0	1	1	1	0	1	0	0	0	2.01	1	2.94	1	0.58	0	46.6	1	16	0
0	48	0	23.5	0	0	0	0	8	1	0	0	-521.67	2	1	0	0	0	0	0	1	0	0	0	1.35	0	2.08	1	1.16	0	57	1	16	0
0	67	1	27.9	1	0	1	0	13	2	1	0	-626.36	1	0	0	0	0	0	1	0	0	0	0	3.53	1	1.67	0	1.3	0	34.95	1	16	0
1	66	0	23.5	0	1	1	0	22	3	0	1	32.26	4	0	0	1	1	1	1	1	1	1	1	13.3	1	2.24	1	0.82	0	33.4	0	16	0
1	52	0	26.5	0	0	0	0	13	2	1	0	-208.39	3	0	1	0	0.57	1	0	0	1	1	0	2.36	1	1.97	1	1	0	33.43	0	16	0
1	55	0	24.9	0	0	0	0	19	2	1	0	-102.77	4	0	0	1	0.85	1	0	0	0	1	1	1.23	0	1.25	0	0.69	0	31.82	0	16.1	0
0	53	0	21.9	0	0	0	0	10	1	0	0	-666.49	1	0	0	0	0	0	0	1	0	0	0	0.96	0	0.6	0	0.58	0	38.9	1	16.1	0
0	70	1	22.3	1	0	0	0	13	2	1	0	-438.34	2	1	0	0	0.24	0	1	0	1	0	0	3.18	1	1.53	0	1.93	1	51.2	1	16.1	0
1	63	0	26.2	0	1	1	0	19	2	1	0	-370.56	3	0	1	0	0.32	1	0	0	0	1	1	2.08	1	2.51	1	0.92	0	42.8	1	16.1	0
0	53	0	25.6	0	0	0	0	10	1	0	0	-706.98	1	0	0	0	0	0	0	0	0	0	1	1.67	0	2.01	1	0.92	0	55.2	1	16.1	0
1	54	0	27.8	0	0	0	0	25	3	0	1	-297.7	3	0	1	0	0.51	1	0	0	1	0	0	1.47	0	1.13	0	1	0	37.3	1	16.2	0
1	57	1	23.7	1	0	0	1	15	2	1	0	-131.55	4	0	0	1	0.81	1	0	1	0	1	0	2.87	1	2.05	1	3.47	1	72.99	1	16.2	0
1	56	1	26.4	0	0	0	1	17	2	1	0	-307.95	3	0	1	0	0.74	1	1	1	1	1	0	2	1	3.24	1	1.08	0	61.61	1	16.2	0
0	51	1	20.8	1	0	1	0	11	2	1	0	-602.11	1	0	0	0	0	0	0	0	0	1	1	5.88	1	1.26	0	0.49	0	40	1	16.2	0
1	49	1	26	0	0	0	0	14	2	1	0	-285.43	3	0	1	0	0.51	1	1	0	0	1	1	2.34	1	1.85	1	0.8	0	65.8	1	16.2	0
0	68	0	22.2	0	0	0	0	20	2	1	0	-619.22	1	0	0	0	0	0	1	0	1	0	0	2.69	1	1.77	0	0.46	0	52.13	1	16.2	0
1	63	0	22.2	0	0	0	0	17	2	1	0	-385.55	3	0	1	0	0	0	0	0	1	0	1	3.72	1	2	1	0.32	0	49.79	1	16.2	0
0	63	0	25.2	0	0	0	0	7	1	0	0	-609.81	1	0	0	0	0	0	0	0	1	0	1	2.69	1	1.12	0	0.66	0	40.69	1	16.3	0
1	48	0	25.8	0	0	1	0	6	1	0	0	-435.51	2	1	0	0	0.24	0	1	0	1	1	0	1.23	0	1.08	0	1.12	0	41.96	1	16.3	0
0	63	0	25.9	0	0	0	0	7	1	0	0	-650.21	1	0	0	0	0	0	0	0	1	0	0	2.43	1	3.04	1	1	0	39.86	1	16.4	0
1	73	0	22.7	0	0	0	1	30	3	0	1	-298.28	3	0	1	0	0.44	1	1	1	0	0	0	2.46	1	4.14	1	3.87	1	43.07	1	16.4	0
0	44	0	21.7	0	0	1	0	9	1	0	0	-621.94	1	0	0	0	0	0	0	0	0	1	0	1.69	0	1.67	0	1.25	0	36.6	1	16.4	0
0	53	0	25.7	0	0	1	1	10	1	0	0	-653.75	1	0	0	0	0	0	0	0	0	1	0	2.66	1	1.36	0	0.41	0	40.69	1	16.4	0
1	69	0	32	0	0	0	1	15	2	1	0	-489.95	2	1	0	0	0.19	0	0	0	1	1	0	1.6	0	2.26	1	0.65	0	29.6	0	16.5	0
0	66	0	28.8	0	0	0	0	10	1	0	0	-175.49	4	0	0	1	0.77	1	0	0	1	1	0	0.77	0	1.42	0	0.91	0	38.59	1	16.5	0
0	39	1	25.5	0	0	1	0	7	1	0	0	-531.32	2	1	0	0	0	0	1	0	1	0	0	3.31	1	1.44	0	1.17	0	43.6	1	16.5	0
1	67	0	26	0	0	1	0	10	1	0	0	-555.43	2	1	0	0	0.11	0	0	0	1	1	0	2.35	1	1.4	0	0.81	0	27.2	0	16.6	0
1	64	0	24	0	0	0	0	12	2	1	0	-660.96	1	0	0	0	0	0	0	0	0	0	0	2.84	1	1.3	0	0.84	0	47.3	1	16.6	0
0	61	0	24	0	0	0	0	7	1	0	0	-369.83	3	0	1	0	0	0	0	0	0	1	1	0.99	0	2.95	1	0.99	0	45.34	1	16.6	0
1	73	0	25.7	0	0	0	0	21	3	0	1	-192.34	4	0	0	1	0.83	1	0	1	1	1	0	1.98	1	1.38	0	0.46	0	98.12	1	16.6	0
0	49	1	27	0	0	0	0	11	2	1	0	-679.14	1	0	0	0	0	0	0	0	0	0	0	1.02	0	5.32	1	1.05	0	37.9	1	16.6	0
0	35	0	29.6	0	0	1	0	9	1	0	0	-557.12	2	1	0	0	0	0	0	0	0	0	1	0.95	0	1.83	1	1.52	0	46.3	1	16.6	0
0	62	0	27.3	0	0	0	0	26	3	0	1	-212.26	3	0	1	0	0.62	1	0	1	1	1	1	1.33	0	0.83	0	0.46	0	39.7	1	16.6	0
0	70	0	20.6	0	0	1	0	17	2	1	0	-523.85	2	1	0	0	0.2	0	0	0	1	1	0	2.13	1	1.42	0	0.85	0	47.8	1	16.7	0
0	49	0	23.9	0	0	0	0	10	1	0	0	-715.07	1	0	0	0	0	0	0	0	0	0	0	1.19	0	2.12	1	0.88	0	62.1	1	16.7	0
0	48	0	20.6	0	0	0	0	12	2	1	0	-520.26	2	1	0	0	0	0	0	0	1	1	0	0.73	0	1.5	0	0.9	0	43.69	1	16.7	0
0	49	0	24.9	0	1	0	0	11	2	1	0	-16.92	4	0	0	1	1	1	0	0	1	0	0	1.39	0	1.54	0	0.92	0	46.36	1	16.7	0
1	51	1	25.9	0	0	1	0	30	3	0	1	20.84	4	0	0	1	1	1	0	1	1	1	0	3.97	1	2.67	1	1.41	0	48.59	1	16.7	0
0	46	0	23.7	0	0	0	0	7.5	1	0	0	-742.05	1	0	0	0	0	0	0	0	1	0	1	1.07	0	1.37	0	0.85	0	28.29	0	16.7	0
0	47	0	23.3	0	0	0	0	10	1	0	0	-560.84	2	1	0	0	0	0	0	0	0	0	0	0.4	0	1.68	0	0.78	0	28.1	0	16.8	0
0	45	0	25.7	0	0	0	0	23	3	0	1	-437.2	2	1	0	0	0	0	0	0	0	0	1	1.09	0	97	1	1.06	0	25.9	0	16.8	0
1	61	1	23.3	1	0	1	0	26	3	0	1	37.86	4	0	0	1	1	1	1	1	1	1	1	10.3	1	1.33	0	1.16	0	45.6	1	16.8	0
1	57	0	27.8	0	0	1	0	16	2	1	0	45.11	4	0	0	1	1	1	0	1	0	0	0	4.38	1	2.38	1	1.06	0	30.02	0	16.8	0
1	54	0	26.6	0	0	0	0	16	2	1	0	23.96	4	0	0	1	1	1	0	1	1	0	0	2.39	1	1.26	0	1.33	0	30.3	0	16.8	0
1	63	0	23.8	0	0	0	0	13	2	1	0	-240.91	3	0	1	0	0.62	1	0	1	1	0	1	1.77	0	1.22	0	0.97	0	62.1	1	16.8	0
0	49	0	23.6	0	0	0	1	7	1	0	0	-602.89	1	0	0	0	0	0	0	0	0	0	0	3.04	1	1.55	0	1.45	0	49.8	1	16.8	0
0	58	0	23.8	0	0	0	1	9	1	0	0	-657.12	1	0	0	0	0	0	0	0	0	0	0	2.91	1	1.15	0	0.62	0	69.9	1	16.8	0
1	46	0	23.5	0	0	0	0	7	1	0	0	-577.91	2	1	0	0	0	0	0	0	1	0	1	1.43	0	1.23	0	1.06	0	47.1	1	16.9	0
1	56	1	26.5	0	0	1	0	24	3	0	1	-472.98	2	1	0	0	0.24	0	0	1	1	1	0	4.15	1	2.23	1	1.21	0	35.6	1	16.9	0
0	58	0	23.7	0	0	0	0	8.3	1	0	0	-658.81	1	0	0	0	0	0	0	0	0	0	0	1.07	0	1.14	0	0.95	0	44.65	1	16.9	0
1	65	1	27.8	1	1	1	0	22	3	0	1	-172.7	4	0	0	1	0.38	1	0	1	1	1	0	3.35	1	2.07	1	1.7	1	55	1	16.9	0
0	55	0	34.1	0	0	1	0	12	2	1	0	-439.39	2	1	0	0	0.21	0	0	1	1	1	0	0.76	0	1.17	0	0.81	0	24.9	0	16.9	0
1	36	0	26.3	0	0	1	0	16	2	1	0	-267.68	3	0	1	0	0.46	1	1	0	1	0	0	0.71	0	1.7	0	0.91	0	24.88	0	16.9	0
0	51	0	21.8	0	0	0	1	13	2	1	0	-301.84	3	0	1	0	0.38	1	0	0	1	1	0	2.27	1	2.84	1	1.27	0	48.34	1	17	0
0	61	1	34.5	0	1	0	0	9	1	0	0	-668.74	1	0	0	0	0	0	0	0	1	0	0	2.62	1	2.03	1	1.02	0	46.78	1	17	0
1	76	0	22.2	0	0	1	0	30	3	0	1	41.33	4	0	0	1	1	1	0	1	1	1	0	7.33	1	7.28	1	0.61	0	81.2	1	17	0
0	41	0	24.1	1	0	0	0	12	2	1	0	-647.65	1	0	0	0	0	0	0	0	0	0	0	1.04	0	1.04	0	0.46	0	36.88	1	17	0
0	51	0	22.8	0	0	0	0	8	1	0	0	-526.95	2	1	0	0	0	0	0	0	0	0	0	1.24	0	2.04	1	1.24	0	47.05	1	17	0
0	36	0	18.8	0	0	0	0	8	1	0	0	-542.85	2	1	0	0	0	0	0	0	1	1	0	1.03	0	0.95	0	1.26	0	37.12	1	17	0
0	66	0	28.3	0	0	0	0	10	1	0	0	-591.81	2	1	0	0	0	0	0	0	1	0	0	2.47	1	1.56	0	0.85	0	40.5	1	17	0
0	61	0	20.9	0	0	1	0	10	1	0	0	-542.8	2	1	0	0	0	0	0	0	0	0	1	1.57	0	3.69	1	0.56	0	43.5	1	17.1	0
0	58	0	25.2	0	0	0	0	8	1	0	0	-558.72	2	1	0	0	0	0	0	0	0	1	0	0.54	0	2.53	1	0.85	0	47.4	1	17.1	0
0	42	0	19.7	0	0	0	0	10.5	2	1	0	-654.05	1	0	0	0	0	0	0	0	0	0	1	0.61	0	2.21	1	0.88	0	37.76	1	17.1	0
0	56	0	22.4	0	0	1	0	17	2	1	0	-625.42	1	0	0	0	0	0	1	0	0	0	1	1.51	0	1.63	0	0.79	0	38.5	1	17.1	0
1	63	0	21.2	0	0	0	0	15	2	1	0	-571.64	2	1	0	0	0.11	0	0	0	0	1	0	1.11	0	1.61	0	0.77	0	43.6	1	17.1	0
1	57	0	24.8	0	0	0	0	28	3	0	1	38.12	4	0	0	1	1	1	1	1	1	1	0	1.5	0	1.28	0	0.69	0	52.52	1	17.1	0
1	62	1	27.9	0	0	0	0	6	1	0	0	-678.31	1	0	0	0	0	0	0	1	1	0	0	1.71	0	1.69	0	1.47	0	45	1	17.1	0
0	62	1	22	1	0	0	0	13	2	1	0	-618.28	1	0	0	0	0	0	0	0	1	0	0	3.16	1	2.03	1	2.21	1	50.25	1	17.1	0
0	46	0	23.5	0	0	0	0	9	1	0	0	-733.27	1	0	0	0	0	0	0	0	0	0	0	2.45	1	1.37	0	1.33	0	26.93	0	17.1	0
1	68	1	19.1	1	1	0	1	27	3	0	1	36.92	4	0	0	1	1	1	0	1	1	0	0	3.63	1	3.63	1	3.73	1	33.9	1	17.2	0
1	65	0	31.2	0	0	1	0	12	2	1	0	-112.51	4	0	0	1	0.76	1	0	1	1	1	1	2.02	1	1.72	0	1.36	0	37.57	1	17.2	0
1	46	0	23.3	0	0	0	0	16	2	1	0	-442.18	2	1	0	0	0.24	0	0	0	0	0	1	1.5	0	1.95	1	1.75	1	32.49	0	17.2	0
0	67	1	25	1	0	1	0	20	2	1	0	-581.93	2	1	0	0	0	0	1	0	1	0	0	3.05	1	2.31	1	1.48	0	39.7	1	17.3	0
0	44	0	26.9	0	0	0	0	8	1	0	0	-583.14	2	1	0	0	0	0	0	0	0	0	0	0.62	0	1.17	0	1.36	0	53.8	1	17.3	0
0	67	0	28.2	0	0	1	0	18	2	1	0	-609.35	1	0	0	0	0	0	0	0	1	0	0	3.48	1	2.98	1	0.79	0	58.16	1	17.3	0
0	55	0	19.1	0	0	0	0	8	1	0	0	-622.41	1	0	0	0	0	0	0	0	0	0	0	3.11	1	1.53	0	0.31	0	25.3	0	17.4	0
0	56	0	24.1	0	0	0	0	7	1	0	0	-709.36	1	0	0	0	0	0	1	0	1	0	0	1.06	0	1.04	0	0.69	0	25.02	0	17.5	0
1	59	1	28.3	0	0	0	0	19	2	1	0	33.17	4	0	0	1	1	1	1	1	1	1	0	1.75	0	3.91	1	2.97	1	36.58	1	17.5	0
0	31	0	24	0	0	0	0	9.6	1	0	0	-529.51	2	1	0	0	0	0	0	0	0	0	0	1.65	0	1.44	0	0.69	0	26.5	0	17.5	0
1	55	1	25.7	0	0	0	0	20	2	1	0	-563.23	2	1	0	0	0	0	1	0	0	1	0	2.25	1	1.35	0	1.23	0	33.7	1	17.6	0
1	57	0	26	0	0	1	0	10	1	0	0	-565.44	2	1	0	0	0	0	0	0	0	1	0	1.95	0	1.49	0	0.61	0	28.3	0	17.6	0
0	67	1	27.7	1	1	0	0	30	3	0	1	-242.36	3	0	1	0	0.74	1	0	0	1	1	0	1.98	1	0.77	0	0.65	0	30.6	0	17.6	0
0	70	0	29.5	0	0	0	1	25	3	0	1	-567.64	2	1	0	0	0	0	0	1	1	0	0	1.93	0	1.37	0	0.73	0	37.23	1	17.6	0
1	56	0	25.7	0	0	0	0	20	2	1	0	-378.52	3	0	1	0	0.34	1	0	1	1	0	0	2.24	1	1.08	0	0.48	0	27.37	0	17.6	0
0	53	0	21.4	0	0	0	0	25	3	0	1	-442.39	2	1	0	0	0.22	0	0	1	0	0	0	6	1	2.7	1	1.35	0	57.4	1	17.7	0
0	56	0	23.8	0	1	0	0	11	2	1	0	-751.35	1	0	0	0	0	0	0	0	1	1	0	2.13	1	1.54	0	0.82	0	30.15	0	17.7	0
0	69	0	26.2	0	0	1	0	18	2	1	0	-356.2	3	0	1	0	0.35	1	0	1	0	0	1	2.63	1	2.38	1	0.38	0	37.8	1	17.7	0
0	58	1	24.8	1	0	0	0	10	1	0	0	-443.12	2	1	0	0	0.22	0	0	0	1	0	0	2.63	1	2.42	1	0.56	0	47.61	1	17.7	0
0	37	0	22.4	0	0	0	0	7	1	0	0	-611.36	1	0	0	0	0	0	0	0	0	0	0	1.7	0	1.44	0	1.08	0	41.2	1	17.7	0
1	51	0	22.9	0	0	0	0	13	2	1	0	-542.02	2	1	0	0	0	0	0	1	0	1	0	0.98	0	1.03	0	0.35	0	30.6	0	17.8	1
0	61	1	24.4	0	1	1	0	12	2	1	0	-527.58	2	1	0	0	0	0	0	0	1	0	1	0.63	0	2.04	1	1.24	0	45.5	1	17.8	1
0	71	0	20.7	0	0	0	0	16	2	1	0	-564.79	2	1	0	0	0	0	0	0	0	1	0	2.61	1	3.16	1	0.48	0	70.05	1	17.8	1
1	69	1	27.9	0	0	0	0	13	2	1	0	-150.31	4	0	0	1	0.85	1	0	0	1	0	0	2.41	1	4.3	1	0.95	0	75.4	1	17.8	1
1	67	0	26.8	0	1	0	0	12	2	1	0	-423.94	2	1	0	0	0.25	0	0	0	0	1	0	3	1	2.23	1	0.94	0	55.09	1	17.8	1
0	57	1	26.3	0	0	0	0	14	2	1	0	-619.91	1	0	0	0	0	0	0	0	0	0	0	1.5	0	2.55	1	0.86	0	33.53	1	17.8	1
1	48	0	21.1	0	0	1	0	27	3	0	1	-215.62	3	0	1	0	0.53	1	0	0	1	1	1	7.7	1	3.46	1	0.86	0	62.4	1	17.9	1
0	59	0	26.6	0	0	1	0	7	1	0	0	-731.46	1	0	0	0	0	0	0	0	1	0	0	1.59	0	2.28	1	1.37	0	47.41	1	17.9	1
1	67	0	23.4	0	1	0	1	15	2	1	0	-231.02	3	0	1	0	0.49	1	0	0	0	1	0	1.93	0	1.62	0	0.69	0	39.9	1	17.9	1
0	66	0	17.8	0	0	1	0	12	2	1	0	-623.16	1	0	0	0	0.12	0	0	0	0	0	0	5.03	1	3.99	1	1.09	0	56.49	1	17.9	1
1	75	1	22	1	0	1	1	13	2	1	0	-124.81	4	0	0	1	0.78	1	0	1	1	0	1	5.84	1	4.88	1	1.79	1	90.9	1	17.9	1
0	45	0	22.1	0	0	1	0	9	1	0	0	-427.05	2	1	0	0	0	0	0	0	1	1	0	2.16	1	2.2	1	1.47	0	103	1	17.9	1
1	68	0	23.2	0	1	0	0	13	2	1	0	-356.75	3	0	1	0	0.27	1	0	1	1	0	0	4.11	1	2.99	1	0.24	0	41.3	1	17.97	1
0	58	0	26.8	0	0	0	0	8.5	1	0	0	-448.34	2	1	0	0	0.2	0	0	0	1	1	0	1.74	0	1.32	0	0.53	0	43.16	1	18	1
0	68	0	32.5	1	0	0	0	8.5	1	0	0	-560.92	2	1	0	0	0	0	0	0	1	0	0	0.96	0	2.7	1	0.51	0	33.92	1	18	1
0	45	0	28.2	0	0	1	1	8	1	0	0	-380.89	3	0	1	0	0.31	1	0	0	0	1	0	1.56	0	0.79	0	1.68	1	33.5	1	18	1
1	55	0	24.4	1	0	1	0	11	2	1	0	-316.13	3	0	1	0	0.41	1	0	0	0	0	0	3.35	1	1.85	1	0.81	0	33.1	0	18	1
0	65	0	25	0	0	0	0	9.5	1	0	0	-639.38	1	0	0	0	0	0	0	0	0	0	0	2.54	1	2.2	1	0.66	0	48.49	1	18	1
0	61	0	20.9	0	0	0	1	16	2	1	0	-623.33	1	0	0	0	0	0	0	0	0	0	0	1.93	0	1.74	0	1.54	0	40.6	1	18	1
1	62	0	23.6	0	1	1	0	24	3	0	1	-75.03	4	0	0	1	0.94	1	1	0	1	1	0	3.44	1	0.93	0	0.54	0	38.85	1	18	1
1	63	1	24.3	1	0	1	0	18	2	1	0	43.77	4	0	0	1	1	1	0	0	1	1	1	22.4	1	2.3	1	1.36	0	38.69	1	18	1
0	65	0	19.5	0	0	0	0	12	2	1	0	-663.12	1	0	0	0	0	0	0	0	0	0	0	0.95	0	2.37	1	0.56	0	54.86	1	18.1	1
1	74	0	26.2	0	0	0	0	16	2	1	0	15.81	4	0	0	1	1	1	0	1	0	1	0	1.56	0	3.77	1	1.62	0	64.17	1	18.1	1
0	48	0	22.7	0	0	0	1	10	1	0	0	-689.59	1	0	0	0	0	0	0	0	0	0	1	0.86	0	1.27	0	1.13	0	48.6	1	18.1	1
1	65	1	32.8	1	0	0	0	14	2	1	0	17.23	4	0	0	1	1	1	0	1	0	1	1	10.1	1	2.03	1	1.13	0	50.36	1	18.1	1
1	69	1	25	1	0	0	0	30	3	0	1	-136.64	4	0	0	1	0.81	1	1	1	1	0	0	5.35	1	1.07	0	1.17	0	41.77	1	18.2	1
1	56	0	18	0	0	0	0	22	3	0	1	-419.47	2	1	0	0	0.28	1	1	1	1	1	0	2.49	1	1.22	0	0.45	0	67.25	1	18.2	1
1	80	1	21.2	1	0	0	0	14	2	1	0	-50.65	4	0	0	1	1	1	0	1	1	0	1	3.37	1	2.53	1	1.09	0	46.48	1	18.2	1
0	46	0	23	0	0	0	0	8	1	0	0	-628.98	1	0	0	0	0	0	0	0	0	1	0	0.74	0	0.93	0	0.79	0	55.5	1	18.2	1
0	73	0	18.6	0	0	0	0	26	3	0	1	-146.59	4	0	0	1	0.84	1	0	0	1	1	1	4.56	1	2.22	1	0.61	0	52.1	1	18.3	1
1	54	0	26	0	0	0	0	19	2	1	0	-409.37	2	1	0	0	0.31	1	1	0	1	1	0	2.76	1	3.75	1	1.12	0	49.22	1	18.3	1
1	66	1	29.4	1	0	0	0	15	2	1	0	-311.81	3	0	1	0	0.35	1	1	0	1	0	1	2.23	1	0.42	0	0.83	0	34.09	1	18.4	1
1	64	1	26.2	1	1	1	1	18	2	1	0	-408.87	2	1	0	0	0.34	1	0	0	1	0	0	5.64	1	2.55	1	0.63	0	44.6	1	18.5	1
1	50	1	26.1	1	0	0	0	6	1	0	0	55.12	4	0	0	1	1	1	0	1	0	1	0	2.66	1	1.72	0	0.89	0	34.29	1	18.5	1
1	59	1	24.2	1	1	1	0	21	3	0	1	-125.27	4	0	0	1	0.75	1	0	0	1	0	1	2.61	1	2.95	1	1.03	0	63.3	1	18.5	1
1	65	0	30.3	0	1	0	0	14	2	1	0	-355.49	3	0	1	0	0.26	0	0	0	1	1	0	2.17	1	2.04	1	1.04	0	45.3	1	18.5	1
0	67	1	24.3	0	1	1	0	25	3	0	1	-56.51	4	0	0	1	0.92	1	0	1	1	1	0	4.5	1	1.78	0	1.13	0	39.42	1	18.5	1
1	60	1	22.4	1	0	0	0	14	2	1	0	-544.39	2	1	0	0	0	0	1	0	1	0	0	3.4	1	2.82	1	1.39	0	63.99	1	18.6	1
0	66	1	24.7	1	1	1	1	13	2	1	0	-425.37	2	1	0	0	0.28	1	0	0	1	0	0	2.27	1	2.93	1	1.61	0	54.55	1	18.6	1
1	62	0	24.6	0	0	0	0	20	2	1	0	-306.75	3	0	1	0	0.59	1	0	1	0	1	0	1.44	0	2.17	1	0.57	0	19.3	0	18.6	1
1	53	1	27.1	1	0	0	0	23	3	0	1	-319.22	3	0	1	0	0.31	1	1	1	1	1	0	3.6	1	2.92	1	0.63	0	56.73	1	18.6	1
0	60	1	27	1	1	1	0	9	1	0	0	-653.26	1	0	0	0	0	0	1	0	0	0	0	2.16	1	3.46	1	2.91	1	82.3	1	18.6	1
1	66	0	31.2	0	0	0	1	13	2	1	0	-448.98	2	1	0	0	0.24	0	0	0	1	1	0	0.3	0	3.5	1	0.73	0	27.4	0	18.6	1
1	64	1	27.3	1	1	1	0	25	3	0	1	27.81	4	0	0	1	1	1	0	1	1	1	0	2.81	1	2.41	1	3.19	1	62.5	1	18.6	1
0	69	1	24.1	1	0	0	0	25	3	0	1	-308.18	3	0	1	0	0.38	1	1	0	1	1	0	1.52	0	1.45	0	1.03	0	45.69	1	18.6	1
0	63	0	27.5	0	0	0	1	11	2	1	0	-609.32	1	0	0	0	0.06	0	0	0	0	0	1	3.04	1	1.35	0	0.3	0	47.38	1	18.7	1
0	59	1	28	0	0	0	0	11	2	1	0	-654.04	1	0	0	0	0	0	0	0	1	0	1	3.63	1	1.41	0	1.49	0	38.76	1	18.7	1
1	75	1	29.8	0	0	1	0	27	3	0	1	-204.62	3	0	1	0	0.53	1	0	1	1	1	0	1.03	0	1.61	0	1.53	0	27.8	0	18.7	1
0	52	0	20.9	0	0	1	0	21	3	0	1	-686.25	1	0	0	0	0	0	0	0	0	0	1	2.35	1	2.33	1	1.29	0	49.4	1	18.7	1
1	78	0	22.3	0	1	1	0	9	1	0	0	-116.98	4	0	0	1	0.83	1	0	0	1	0	0	4.03	1	1.47	0	0.82	0	37.52	1	18.8	1
0	53	0	18.2	0	0	0	0	8	1	0	0	-682.48	1	0	0	0	0	0	0	0	1	0	0	0.96	0	1.22	0	0.94	0	39.2	1	18.8	1
1	63	0	26.1	0	0	1	0	14	2	1	0	-168.4	4	0	0	1	0.79	1	0	1	0	0	0	1.18	0	2.1	1	0.92	0	69	1	18.8	1
0	62	1	28	0	0	0	0	10	1	0	0	-612.33	1	0	0	0	0	0	0	0	0	1	0	1.73	0	5.53	1	1.13	0	29.55	0	18.8	1
1	63	0	25.9	0	0	0	0	11	2	1	0	-68.31	4	0	0	1	0.92	1	0	1	1	1	0	2.4	1	2.63	1	0.96	0	32.4	0	18.8	1
1	68	0	27.2	0	0	0	0	14	2	1	0	-558.68	2	1	0	0	0	0	0	0	1	0	1	2.18	1	2.71	1	0.95	0	60.77	1	18.8	1
1	69	1	23.9	0	1	1	0	17	2	1	0	28.06	4	0	0	1	1	1	0	1	0	0	0	4.97	1	3.36	1	0.34	0	37.9	1	18.9	1
0	67	0	30.5	0	0	0	0	13	2	1	0	-577.69	2	1	0	0	0	0	0	0	1	0	0	2.73	1	2.32	1	0.92	0	47.48	1	18.9	1
1	54	0	29	0	0	0	1	16	2	1	0	-305.96	3	0	1	0	0.5	1	0	1	1	1	0	3.4	1	2.26	1	0.87	0	42.9	1	18.9	1
0	73	0	29.5	0	0	1	1	10	1	0	0	-413.62	2	1	0	0	0.25	0	0	0	1	0	0	2.45	1	1.48	0	0.69	0	41.39	1	19	1
1	57	0	27.1	0	0	1	1	20	2	1	0	-264.36	3	0	1	0	0	0	0	1	0	0	0	5.01	1	2.35	1	0.32	0	42.76	1	19	1
0	65	0	17	0	0	1	0	12	2	1	0	-667.7	1	0	0	0	0	0	0	0	1	0	1	2.81	1	2.14	1	0.55	0	33.9	1	19	1
1	74	1	24.5	1	1	1	0	15	2	1	0	-403.14	2	1	0	0	0.27	1	1	0	1	0	1	3.49	1	2.48	1	1.3	0	28.2	0	19	1
1	66	1	24.5	0	0	1	0	19	2	1	0	-13.44	4	0	0	1	1	1	1	1	1	0	0	3.68	1	1.19	0	0.44	0	43.93	1	19	1
1	59	0	32	0	0	1	0	22	3	0	1	7.48	4	0	0	1	1	1	0	1	1	1	1	2.49	1	2.03	1	1.42	0	39.11	1	19	1
0	33	0	16.7	0	0	1	0	9	1	0	0	-640.32	1	0	0	0	0	0	0	0	0	0	0	2.16	1	2.14	1	1.11	0	33.5	1	19	1
1	75	0	21.9	0	1	1	0	25	3	0	1	-41.94	4	0	0	1	0.9	1	0	0	1	1	0	1.59	0	1.8	1	0.64	0	59.67	1	19	1
0	54	0	22.5	0	0	0	0	19	2	1	0	-663.11	1	0	0	0	0	0	0	0	0	0	1	3.95	1	2.04	1	0.58	0	39.79	1	19	1
1	67	1	26.8	1	0	0	0	17	2	1	0	-399.29	3	0	1	0	0.3	1	0	0	0	1	0	3.37	1	2.08	1	2.09	1	58.84	1	19.1	1
1	50	0	24.5	0	0	0	1	18	2	1	0	24.14	4	0	0	1	1	1	0	1	1	1	0	2.19	1	2.61	1	0.56	0	27.6	0	19.1	1
0	47	0	23	0	0	0	0	13	2	1	0	-701.13	1	0	0	0	0	0	0	0	0	0	1	1.2	0	2.3	1	1.51	0	33.1	0	19.1	1
0	44	0	27.1	0	0	0	0	8	1	0	0	-638.84	1	0	0	0	0	0	0	0	0	0	0	1.78	0	1.97	1	0.55	0	36.34	1	19.1	1
1	65	0	35.7	0	0	0	0	14	2	1	0	-228.9	3	0	1	0	0.59	1	0	0	0	1	0	4.35	1	3.35	1	0.81	0	58.5	1	19.1	1
0	58	0	26.2	0	0	0	1	10	1	0	0	-506.21	2	1	0	0	0	0	1	1	0	0	0	3.29	1	1.21	0	0.82	0	30.5	0	19.1	1
1	76	0	29.5	0	0	1	0	12	2	1	0	-170.81	4	0	0	1	0.83	1	0	1	1	1	0	6.16	1	2.62	1	0.57	0	130.3	1	19.2	1
0	47	0	23.6	0	0	1	0	11	2	1	0	41.52	4	0	0	1	1	1	0	0	0	0	0	1.47	0	1.15	0	0.84	0	44.7	1	19.2	1
0	57	0	22.8	0	0	1	0	8	1	0	0	-255.34	3	0	1	0	0.55	1	0	0	1	0	0	1.41	0	2.39	1	1.18	0	52.73	1	19.2	1
0	49	0	32	0	0	0	1	13	2	1	0	-707.87	1	0	0	0	0	0	0	0	1	0	0	4.3	1	0.96	0	0.55	0	38.03	1	19.2	1
0	34	1	30.7	1	0	0	0	9.6	1	0	0	-452.63	2	1	0	0	0.24	0	0	0	0	1	1	2.2	1	0.91	0	0.73	0	28.68	0	19.2	1
0	69	1	28.7	0	1	1	0	20	2	1	0	-476.99	2	1	0	0	0	0	0	0	0	0	0	5.21	1	1.21	0	0.8	0	50.2	1	19.2	1
1	81	1	28.2	0	0	1	0	25	3	0	1	-40.12	4	0	0	1	0.88	1	1	1	1	1	0	1.07	0	2.23	1	1.96	1	45.25	1	19.2	1
0	68	0	25.6	0	1	0	0	12	2	1	0	-418.31	2	1	0	0	0.22	0	1	1	1	1	0	3.13	1	2.42	1	0.73	0	37.8	1	19.2	1
1	68	1	25.5	1	1	1	0	30	3	0	1	48.97	4	0	0	1	1	1	0	1	1	1	0	3.2	1	2.14	1	0.75	0	31.4	0	19.2	1
0	61	0	23.2	0	0	0	0	10	1	0	0	-753.08	1	0	0	0	0	0	1	0	0	0	0	3.78	1	1.72	0	0.74	0	50.58	1	19.3	1
1	64	0	31.6	0	1	1	1	18	2	1	0	-336.18	3	0	1	0	0.42	1	0	1	1	1	0	2.05	1	3.24	1	0.67	0	20.25	0	19.4	1
0	65	0	25.1	0	1	1	0	10	1	0	0	-674.54	1	0	0	0	0	0	0	0	0	0	0	6.49	1	1.33	0	0.86	0	27.3	0	19.5	1
0	55	0	37.7	0	0	0	0	13	2	1	0	-489.72	2	1	0	0	0.17	0	0	0	0	0	0	2.66	1	1.41	0	0.57	0	36.45	1	19.5	1
1	64	0	25.3	0	1	1	0	29	3	0	1	-386.3	3	0	1	0	0.29	1	0	0	1	1	0	1.9	0	2.66	1	0.98	0	43.1	1	19.5	1
1	65	0	21.4	0	0	1	0	25	3	0	1	-377.48	3	0	1	0	0.38	1	0	0	1	0	0	4.07	1	3.77	1	0.56	0	58	1	19.5	1
0	66	1	23.9	1	0	0	0	6	1	0	0	-635.3	1	0	0	0	0	0	0	0	0	0	0	2.43	1	2.07	1	1.2	0	11.2	0	19.5	1
0	63	0	26	0	0	1	1	12	2	1	0	-205.85	3	0	1	0	0.41	1	0	0	1	0	1	1.55	0	1.61	0	0.6	0	42.3	1	19.6	1
1	73	1	24.3	1	0	1	0	11	2	1	0	-227.25	3	0	1	0	0.57	1	1	1	1	0	1	16.9	1	3.21	1	1.46	0	17.47	0	19.6	1
0	68	1	27.8	0	0	1	1	10	1	0	0	-561.35	2	1	0	0	0	0	0	0	1	1	0	0.86	0	1.67	0	1.14	0	49.7	1	19.6	1
1	71	0	26.3	0	0	1	0	14	2	1	0	-457.02	2	1	0	0	0.24	0	1	0	1	0	1	1.7	0	1.37	0	1.34	0	71.9	1	19.6	1
1	65	1	18.3	1	1	0	0	23	3	0	1	35.33	4	0	0	1	1	1	0	1	0	0	0	11	1	10	1	5.35	1	421.3	1	19.6	1
0	52	0	27.7	0	0	1	0	8	1	0	0	-649.69	1	0	0	0	0	0	0	0	0	0	0	1.33	0	2.11	1	1.01	0	35.57	1	19.7	1
0	56	0	22.2	0	0	1	0	11	2	1	0	-685.08	1	0	0	0	0	0	0	0	0	0	0	4.02	1	2.92	1	0.32	0	38.58	1	19.7	1
0	55	0	29.4	0	0	1	1	9	1	0	0	-307.81	3	0	1	0	0.32	1	0	0	1	0	0	1.49	0	3.34	1	1.55	0	35.67	1	19.7	1
1	66	0	21.5	0	0	0	0	14	2	1	0	-109.12	4	0	0	1	0.87	1	0	1	1	1	0	2.53	1	1.17	0	0.36	0	46.5	1	19.8	1
1	50	0	24.9	0	0	1	0	23	3	0	1	-220.67	3	0	1	0	0.62	1	1	1	1	1	1	1.72	0	1.89	1	1.15	0	42.36	1	19.8	1
1	58	0	22.2	0	0	0	0	11	2	1	0	-136.85	4	0	0	1	0.82	1	0	1	1	1	0	2.31	1	1.05	0	1.54	0	42.9	1	19.8	1
0	50	0	28.1	0	0	1	1	14	2	1	0	-518.85	2	1	0	0	0	0	1	0	0	1	0	1.62	0	2.61	1	0.52	0	39.84	1	19.8	1
1	68	0	28.4	0	0	0	0	12	2	1	0	72.5	4	0	0	1	1	1	0	0	1	1	0	3.05	1	2.23	1	0.22	0	54.19	1	19.9	1
1	59	1	24.3	1	1	0	0	19	2	1	0	18.16	4	0	0	1	1	1	0	0	1	1	0	4.67	1	2.18	1	0.85	0	40.61	1	19.9	1
0	70	0	25.5	0	0	1	0	8	1	0	0	-664.62	1	0	0	0	0	0	0	0	1	0	0	3.69	1	1.96	1	0.82	0	55.8	1	19.9	1
1	63	0	19	0	0	1	0	17	2	1	0	18.24	4	0	0	1	1	1	0	1	1	0	1	2.63	1	2.15	1	0.42	0	60.2	1	19.9	1
0	53	1	30.3	1	0	0	1	19	2	1	0	-500.97	2	1	0	0	0	0	0	0	1	1	0	5.65	1	0.84	0	0.54	0	43.78	1	19.9	1
1	55	0	20.8	0	0	1	0	21	3	0	1	26.65	4	0	0	1	1	1	0	0	1	1	1	11.5	1	4.93	1	0.51	0	53.98	1	19.9	1
0	70	1	23.2	1	1	0	0	17	2	1	0	-267.72	3	0	1	0	0.65	1	0	0	1	1	0	2.33	1	3.65	1	2.27	1	58.57	1	19.9	1
0	66	1	22.2	0	0	1	1	16.8	2	1	0	-523.81	2	1	0	0	0	0	0	0	1	0	1	5.11	1	1.74	0	1.39	0	69.6	1	19.9	1
1	68	0	25.7	0	0	1	0	30	3	0	1	25.35	4	0	0	1	1	1	0	1	1	1	1	12.1	1	2.03	1	0.69	0	40.5	1	19.9	1
0	75	1	23.4	0	0	1	0	24	3	0	1	-429.72	2	1	0	0	0.23	0	0	0	0	1	1	4.67	1	2.9	1	1.64	0	53.68	1	19.9	1
0	63	1	23.7	0	0	1	0	11	2	1	0	-676.11	1	0	0	0	0	0	0	0	0	0	1	2.36	1	1.98	1	1.06	0	46.8	1	20.1	1
0	73	1	20.1	0	1	1	1	13	2	1	0	-459.28	2	1	0	0	0.21	0	0	0	1	1	0	2.53	1	5.13	1	1.82	1	81.7	1	20.1	1
1	58	0	27.9	0	0	0	1	24	3	0	1	-102.18	4	0	0	1	0.92	1	0	0	1	1	0	3.01	1	1.19	0	0.77	0	34.3	1	20.1	1
1	65	1	30.4	0	0	0	0	20	2	1	0	-82.47	4	0	0	1	0.89	1	1	0	0	1	0	3.94	1	3.49	1	1.87	1	53.1	1	20.1	1
0	48	0	26.2	0	0	0	0	5	1	0	0	-708.86	1	0	0	0	0	0	0	0	0	0	0	1.31	0	1.57	0	2	1	29.36	0	20.1	1
1	58	1	28.7	1	0	0	0	13	2	1	0	-471.86	2	1	0	0	0	0	0	0	0	0	0	4.25	1	1.35	0	1.49	0	32.19	0	20.2	1
0	52	1	27.1	0	0	0	0	10	1	0	0	-196.27	4	0	0	1	0.81	1	0	0	0	1	0	0.73	0	1.12	0	0.94	0	41.1	1	20.2	1
1	71	0	31.6	0	0	0	0	16	2	1	0	-347.49	3	0	1	0	0.29	1	0	0	0	0	0	1.53	0	2.03	1	0.97	0	53.7	1	20.2	1
0	53	0	19.9	0	0	0	1	8	1	0	0	-618.74	1	0	0	0	0	0	0	0	0	1	0	1.59	0	1.91	1	0.8	0	52.38	1	20.3	1
1	54	0	18.3	0	0	1	0	21	3	0	1	24.14	4	0	0	1	1	1	0	1	1	1	0	1.35	0	4.76	1	2.07	1	57.8	1	20.3	1
0	51	0	28.6	0	0	0	0	20	2	1	0	-524.24	2	1	0	0	0	0	0	1	0	1	1	8.74	1	6.21	1	1.49	0	84.15	1	20.3	1
1	66	0	24.8	0	0	0	0	22	3	0	1	-221.32	3	0	1	0	0.58	1	1	0	1	1	0	0.96	0	1.85	1	0.45	0	37.08	1	20.3	1
0	64	0	27.6	0	1	0	0	10	1	0	0	-420	2	1	0	0	0.22	0	0	0	0	0	0	3.4	1	1.7	0	0.55	0	50.4	1	20.3	1
0	56	0	23.6	0	0	0	0	17	2	1	0	-196.94	4	0	0	1	0.76	1	0	1	1	1	0	1.74	0	2.51	1	1.35	0	76.62	1	20.4	1
0	52	0	23.2	0	0	0	0	7	1	0	0	-671.77	1	0	0	0	0	0	0	0	0	0	0	1.26	0	0.94	0	0.8	0	23.8	0	20.4	1
0	55	0	26.6	0	0	0	0	9.5	1	0	0	-547.61	2	1	0	0	0	0	0	0	1	0	1	1.19	0	2.17	1	0.64	0	52.62	1	20.4	1
0	48	0	22.4	0	0	0	1	6.3	1	0	0	-648.68	1	0	0	0	0	0	0	0	0	0	0	0.88	0	1.35	0	0.66	0	27.04	0	20.5	1
0	55	0	31.6	0	0	0	1	19	2	1	0	-377.1	3	0	1	0	0.33	1	0	1	0	1	0	1.4	0	3.9	1	1.64	0	50.19	1	20.5	1
1	61	0	28.1	0	0	1	0	15	2	1	0	-522.52	2	1	0	0	0	0	0	0	0	0	0	2.95	1	3.03	1	1.14	0	43.8	1	20.5	1
0	59	1	20.7	1	0	0	0	16	2	1	0	-669.19	1	0	0	0	0	0	0	0	0	0	0	1.08	0	1.41	0	0.92	0	36.59	1	20.6	1
1	58	0	25.3	0	0	1	1	16	2	1	0	-547.36	2	1	0	0	0	0	1	0	1	1	0	1.34	0	2.19	1	1.36	0	47.3	1	20.6	1
1	68	1	23	1	1	1	0	17	2	1	0	-600.08	1	0	0	0	0	0	0	0	1	0	0	1.09	0	2.13	1	0.92	0	56.5	1	20.6	1
1	60	1	24.9	0	0	1	0	26	3	0	1	-634.88	1	0	0	0	0.08	0	0	0	0	0	0	3.24	1	2.11	1	1.46	0	48.7	1	20.6	1
1	63	1	23.8	1	1	1	0	29	3	0	1	-211.43	3	0	1	0	0.56	1	0	1	1	0	1	2.01	1	3.6	1	1.38	0	40.98	1	20.6	1
1	50	0	25	0	0	1	0	28	3	0	1	42.98	4	0	0	1	1	1	1	1	0	0	0	8.86	1	2.83	1	1.95	1	20.1	0	20.6	1
1	55	1	28.4	1	0	1	1	12	2	1	0	-358.53	3	0	1	0	0.71	1	0	0	1	1	0	2.6	1	2.04	1	0.88	0	40.09	1	20.7	1
0	63	1	26.3	1	1	0	0	10	1	0	0	-618.14	1	0	0	0	0	0	0	0	1	0	0	2.27	1	2.32	1	1.33	0	43.19	1	20.7	1
0	65	0	21.2	0	0	0	0	27	3	0	1	-397.42	3	0	1	0	0.25	0	0	0	1	1	1	3.97	1	2.89	1	1.05	0	53.33	1	20.8	1
1	56	1	22.7	1	1	1	0	21	3	0	1	-40.82	4	0	0	1	0.94	1	1	0	1	1	0	3.88	1	1.51	0	0.51	0	27.27	0	20.8	1
1	76	1	27.4	1	0	1	1	13	2	1	0	-147.13	4	0	0	1	0.86	1	0	0	0	0	0	9.46	1	3	1	3.73	1	124	1	20.9	1
0	75	0	22.7	0	0	0	0	13	2	1	0	-544.26	2	1	0	0	0	0	1	1	0	0	0	1.89	0	1.89	1	1	0	53.3	1	21	1
1	69	1	32.3	0	0	1	0	25	3	0	1	-574.65	2	1	0	0	0.15	0	0	0	1	1	1	4.33	1	4.56	1	1.36	0	59.33	1	21	1
0	59	0	24	0	0	0	0	7	1	0	0	-560.38	2	1	0	0	0	0	0	0	0	0	0	3.66	1	1.71	0	0.53	0	31.6	0	21	1
1	62	1	26.8	1	0	0	0	30	3	0	1	-306.75	3	0	1	0	0.41	1	0	0	0	1	0	4.94	1	1.33	0	3.12	1	68.6	1	21	1
0	72	1	26.2	1	1	0	1	18	2	1	0	-609.83	1	0	0	0	0	0	0	0	0	0	0	6.47	1	4.62	1	0.36	0	18.29	0	21	1
1	67	0	28	0	0	1	0	17	2	1	0	-419.42	2	1	0	0	0.29	1	0	0	1	0	1	2.36	1	3.07	1	0.66	0	55.39	1	21.1	1
0	30	0	19.3	0	0	0	0	9	1	0	0	-686.4	1	0	0	0	0	0	0	0	1	0	0	0.38	0	1.74	0	2.12	1	34	1	21.1	1
1	68	1	19.8	1	0	1	1	22	3	0	1	-564.69	2	1	0	0	0	0	0	0	1	1	0	8.65	1	9.96	1	1.4	0	6.98	0	21.1	1
0	61	1	27.7	0	0	1	0	10	1	0	0	-400.44	2	1	0	0	0	0	0	1	0	0	1	1.16	0	2.11	1	1.93	1	34.9	1	21.1	1
1	57	0	22.4	0	0	0	0	19	2	1	0	36.65	4	0	0	1	1	1	0	1	1	1	0	1.62	0	3.28	1	1.09	0	63.8	1	21.1	1
1	46	0	27.7	0	0	1	0	10.4	2	1	0	-302.6	3	0	1	0	0.74	1	0	0	1	1	0	1.29	0	1.61	0	0.57	0	39.86	1	21.1	1
1	60	0	28.2	0	0	1	0	25	3	0	1	-173.9	4	0	0	1	0.8	1	0	1	1	1	1	2.97	1	2.28	1	1.23	0	36.21	1	21.1	1
1	47	1	25.2	0	0	1	0	17	2	1	0	-460.18	2	1	0	0	0.21	0	1	0	1	0	0	3.58	1	1.59	0	1.6	0	43.6	1	21.2	1
0	45	0	30	0	0	0	0	8	1	0	0	-636.97	1	0	0	0	0	0	0	0	0	0	0	2.44	1	1.46	0	1	0	28.68	0	21.2	1
0	40	0	23.8	0	0	0	0	7.5	1	0	0	-689.22	1	0	0	0	0	0	0	0	0	0	0	2.21	1	0.91	0	1.12	0	38.83	1	21.2	1
0	68	0	29.1	0	0	1	0	14	2	1	0	-561.04	2	1	0	0	0	0	0	0	0	0	0	2.82	1	3.08	1	1.37	0	40.05	1	21.2	1
1	76	1	27	1	0	0	0	15	2	1	0	-116.17	4	0	0	1	0.77	1	0	0	1	0	0	4.82	1	2.68	1	1.53	0	49.1	1	21.3	1
0	72	0	30.2	0	0	1	0	13	2	1	0	-564.78	2	1	0	0	0	0	0	0	1	0	0	4.11	1	2.22	1	0.52	0	41.23	1	21.4	1
0	33	1	23.8	0	0	0	0	13	2	1	0	-668.56	1	0	0	0	0	0	1	0	0	0	0	1.15	0	2.23	1	1.3	0	36.88	1	21.4	1
0	55	1	25.3	1	1	1	0	17	2	1	0	-431.51	2	1	0	0	0.22	0	1	0	1	0	0	3.47	1	1.65	0	0.98	0	40.27	1	21.4	1
1	68	1	20.8	1	0	1	0	30	3	0	1	42.83	4	0	0	1	1	1	0	1	0	0	0	2.35	1	4.95	1	1.28	0	55.55	1	21.5	1
1	57	1	14.7	1	1	0	0	30	3	0	1	53.39	4	0	0	1	1	1	0	1	1	1	0	2.35	1	2.03	1	1.15	0	18.4	0	21.5	1
0	50	0	21.6	0	0	1	0	12	2	1	0	30.11	4	0	0	1	1	1	0	1	1	1	0	1.71	0	1.1	0	1.15	0	24.83	0	21.6	1
0	74	0	29.6	0	0	0	0	11	2	1	0	-386.78	3	0	1	0	0.27	1	0	0	0	1	0	2.88	1	2.05	1	0.78	0	67.87	1	21.7	1
1	73	0	28.2	0	1	0	1	27	3	0	1	-421.41	2	1	0	0	0.21	0	0	1	0	0	1	3.28	1	2.97	1	1.84	1	35.93	1	21.7	1
1	68	0	22.4	0	1	0	0	15	2	1	0	-658.91	1	0	0	0	0	0	0	0	1	0	0	2.27	1	1.82	1	1.24	0	40.33	1	21.7	1
0	72	0	25.8	0	0	1	0	6	1	0	0	-605.18	1	0	0	0	0	0	0	0	0	0	0	4.31	1	2.53	1	1.09	0	32.98	0	21.7	1
0	69	1	26.8	1	1	1	0	11	2	1	0	-689.56	1	0	0	0	0	0	0	0	0	0	0	3.09	1	1.7	0	1.29	0	38.51	1	21.8	1
0	61	1	29.8	0	0	1	0	13	2	1	0	-524.5	2	1	0	0	0	0	0	0	1	0	0	1.81	0	1.34	0	1.3	0	53.7	1	21.8	1
0	30	0	22.9	0	0	0	0	7	1	0	0	-706.14	1	0	0	0	0	0	1	0	0	0	0	1.52	0	1.32	0	1.08	0	17.41	0	21.8	1
1	64	0	24.4	0	0	0	0	16	2	1	0	-32.14	4	0	0	1	0.94	1	0	0	0	0	0	54.1	1	2.38	1	0.88	0	38.4	1	21.8	1
0	50	0	31.6	0	0	0	0	21	3	0	1	-542.95	2	1	0	0	0	0	0	0	0	0	0	4.91	1	2.25	1	1.25	0	48.74	1	21.9	1
1	61	1	18.4	1	1	1	0	16	2	1	0	-62.83	4	0	0	1	0.9	1	0	1	0	0	1	2.44	1	1.83	1	2.83	1	48.13	1	21.9	1
0	49	0	25.7	0	1	1	0	19	2	1	0	-621.75	1	0	0	0	0	0	0	0	0	1	1	2.98	1	2.15	1	1.12	0	57.9	1	21.9	1
1	66	0	25.6	0	1	1	0	13	2	1	0	-237.68	3	0	1	0	0.68	1	1	0	0	0	1	3.47	1	1.79	1	0.67	0	57.8	1	22	1
1	55	1	30.2	1	0	0	0	30	3	0	1	38.53	4	0	0	1	1	1	0	1	1	0	0	2.11	1	2.17	1	1.81	1	41.93	1	22.1	1
1	47	1	32.6	0	0	0	0	14	2	1	0	-376.55	3	0	1	0	0	0	1	0	0	0	0	7.39	1	1.6	0	0.78	0	40	1	22.1	1
0	50	0	26.4	0	0	1	0	8	1	0	0	-569.73	2	1	0	0	0	0	0	0	0	1	0	1.62	0	2.9	1	0.78	0	46.24	1	22.1	1
1	51	1	23.7	1	1	1	0	16	2	1	0	-251.38	3	0	1	0	0.69	1	1	1	1	0	0	2.07	1	0.99	0	1.08	0	22.25	0	22.1	1
1	81	0	27.7	0	0	1	0	22	3	0	1	48.59	4	0	0	1	1	1	0	1	0	0	1	7.04	1	2.02	1	1.11	0	704	1	22.1	1
0	70	0	25.1	0	0	1	0	15.5	2	1	0	-230.13	3	0	1	0	0.59	1	0	0	1	1	1	2.99	1	1.85	1	0.63	0	43.4	1	22.2	1
0	66	1	23.8	1	1	1	0	15	2	1	0	-553.85	2	1	0	0	0	0	0	1	0	1	0	4.46	1	1.21	0	1.8	1	27.46	0	22.2	1
1	48	0	20.4	0	1	1	1	21	3	0	1	-437.93	2	1	0	0	0.26	0	1	0	0	0	0	0.91	0	1.35	0	0.82	0	59.51	1	22.2	1
0	71	1	30.5	1	0	0	1	13	2	1	0	-567.1	2	1	0	0	0	0	0	0	0	0	0	5.53	1	2.57	1	1.36	0	41.2	1	22.3	1
0	60	1	23.6	1	1	1	1	15	2	1	0	-413.73	2	1	0	0	0.21	0	0	0	1	0	0	3.39	1	3.52	1	0.85	0	46.13	1	22.3	1
1	59	0	31.5	0	0	0	1	8	1	0	0	-264.17	3	0	1	0	0.56	1	0	1	1	0	1	2.92	1	1.82	1	1.72	1	39.4	1	22.4	1
1	58	0	27.4	0	0	0	0	16	2	1	0	-237.75	3	0	1	0	0.74	1	1	1	1	1	1	3.06	1	2.03	1	1.01	0	49.44	1	22.5	1
1	50	1	26.9	0	1	1	0	30	3	0	1	54.38	4	0	0	1	1	1	0	1	1	0	1	198	1	1.76	0	0.79	0	28.1	0	22.5	1
0	51	0	28.2	0	0	0	0	8	1	0	0	-579.12	2	1	0	0	0	0	0	0	0	0	0	1.27	0	2.45	1	0.89	0	53.77	1	22.6	1
0	57	0	23	0	0	1	0	8	1	0	0	-588.09	2	1	0	0	0	0	0	0	0	1	0	1.61	0	3.21	1	1.21	0	67.18	1	22.6	1
1	71	0	22.3	0	0	1	0	25	3	0	1	-246.11	3	0	1	0	0.53	1	0	0	1	1	1	2.36	1	0.97	0	0.45	0	33.6	1	22.6	1
0	55	0	24.1	0	0	0	1	10	1	0	0	-674.81	1	0	0	0	0	0	0	0	0	1	0	1.59	0	1.94	1	1.02	0	38.1	1	22.6	1
0	65	1	22.7	1	0	0	0	8	1	0	0	-735.06	1	0	0	0	0	0	0	0	0	0	0	1.48	0	1.38	0	3.04	1	43.22	1	22.7	1
1	67	0	21.9	0	0	0	1	13	2	1	0	-389.32	3	0	1	0	0.31	1	0	0	0	0	0	1.33	0	2.83	1	0.76	0	65.42	1	22.7	1
1	50	0	23.4	0	0	0	0	17	2	1	0	-285.02	3	0	1	0	0.41	1	0	0	1	1	0	1.59	0	1.32	0	0.59	0	27.75	0	22.7	1
1	48	1	26.3	0	1	0	0	8.8	1	0	0	-257.57	3	0	1	0	0.48	1	0	0	0	0	0	1.72	0	1.03	0	1.88	1	47.96	1	22.8	1
0	66	0	22.7	0	0	1	1	7	1	0	0	-334.04	3	0	1	0	0.41	1	0	0	0	0	0	1.95	0	2.77	1	0.42	0	42.88	1	22.8	1
0	71	1	28.7	1	1	0	1	11	2	1	0	-549.32	2	1	0	0	0	0	0	0	1	0	0	1.05	0	1.69	0	1.87	1	44	1	22.8	1
1	67	1	20.5	1	0	1	0	24	3	0	1	43.28	4	0	0	1	1	1	0	1	1	1	0	2.33	1	2.47	1	1.32	0	36.43	1	22.8	1
1	57	0	24	0	0	0	1	15	2	1	0	-480.62	2	1	0	0	0.18	0	0	0	0	0	1	2.23	1	3.48	1	1.07	0	40.5	1	22.9	1
1	70	0	23.2	0	0	0	0	22	3	0	1	-302.25	3	0	1	0	0.65	1	1	0	1	1	1	1.33	0	1.93	1	0.4	0	59.71	1	22.9	1
0	58	1	23.9	1	0	0	0	9	1	0	0	-754.15	1	0	0	0	0	0	0	0	0	0	0	1.51	0	4.07	1	1.13	0	52.46	1	22.9	1
0	52	1	29.8	0	0	0	0	18	2	1	0	-269.11	3	0	1	0	0.72	1	1	1	1	0	0	3.17	1	1.91	1	1.44	0	66.37	1	22.9	1
0	51	1	25.5	0	0	0	1	7.7	1	0	0	-501.28	2	1	0	0	0	0	0	1	0	1	0	4.11	1	2.48	1	1.2	0	31.38	0	22.9	1
0	49	0	23.5	0	0	0	0	6.1	1	0	0	-696.81	1	0	0	0	0	0	0	0	0	0	0	1.35	0	2.48	1	1.53	0	41.47	1	22.9	1
1	54	0	28.4	0	0	0	0	17	2	1	0	-154.04	4	0	0	1	0.84	1	0	0	0	1	0	5.01	1	1.67	0	1.13	0	46.1	1	23	1
0	56	0	20.8	0	0	0	0	15	2	1	0	-669.37	1	0	0	0	0	0	0	0	0	0	1	1.42	0	2.52	1	1.12	0	40.7	1	23	1
1	54	0	23.7	0	0	1	0	7	1	0	0	-587.49	2	1	0	0	0	0	0	0	0	0	0	2.42	1	2.31	1	0.71	0	39.58	1	23.1	1
0	56	1	25.6	1	0	0	0	25	3	0	1	-386.36	3	0	1	0	0.26	0	0	0	0	1	0	4.63	1	1.92	1	1.61	0	29.49	0	23.2	1
0	59	0	25.8	0	0	0	0	21	3	0	1	-411.73	2	1	0	0	0.27	1	0	0	0	1	1	1.91	0	0.88	0	0.4	0	44.2	1	23.2	1
1	67	0	26.4	0	0	0	0	11	2	1	0	-391.25	3	0	1	0	0.33	1	1	0	0	0	0	1.25	0	5.56	1	1.07	0	35.32	1	23.2	1
0	58	0	26.4	0	0	1	1	14	2	1	0	-649.79	1	0	0	0	0	0	0	0	0	0	0	2.21	1	2.13	1	0.77	0	33.51	1	23.3	1
1	49	0	25.5	0	0	1	0	10	1	0	0	-58.94	4	0	0	1	0.88	1	0	1	0	1	0	1.83	0	1.4	0	0.85	0	28.8	0	23.3	1
0	64	0	32	0	0	0	0	24	3	0	1	-189.41	4	0	0	1	0.76	1	0	1	1	1	0	1.43	0	1.39	0	0.75	0	29.23	0	23.4	1
0	64	1	23.7	1	1	1	0	15	2	1	0	-189.33	4	0	0	1	0.82	1	1	0	1	1	1	3.07	1	1.03	0	1.6	0	37.85	1	23.4	1
0	52	0	26	0	0	0	1	8	1	0	0	-525.61	2	1	0	0	0	0	0	0	0	1	1	1	0	1.62	0	0.59	0	32.09	0	23.4	1
1	45	1	23	1	0	0	0	13	2	1	0	-64.11	4	0	0	1	0.91	1	0	1	1	1	0	0.8	0	3.04	1	1.25	0	49.65	1	23.5	1
0	70	0	22.6	0	0	0	0	9	1	0	0	-580.13	2	1	0	0	0	0	0	0	1	0	0	2.75	1	2.11	1	0.31	0	54.65	1	23.5	1
1	63	1	30.1	0	0	1	0	24	3	0	1	-216.85	3	0	1	0	0.5	1	0	1	0	1	0	2.2	1	2.08	1	1.2	0	36.29	1	23.5	1
0	58	1	26.8	1	1	1	1	11	2	1	0	-594.76	2	1	0	0	0	0	1	0	0	1	0	1.5	0	2.41	1	1.71	1	43.5	1	23.5	1
0	48	1	29.1	0	0	0	1	7	1	0	0	-653.93	1	0	0	0	0	0	0	0	0	0	1	7.95	1	1.04	0	1.41	0	56.95	1	23.5	1
0	70	0	28.8	0	0	0	0	10	1	0	0	-587.12	2	1	0	0	0	0	0	0	0	0	0	2.71	1	1.94	1	0.73	0	49.7	1	23.7	1
1	68	0	27.2	0	0	1	1	22	3	0	1	-234.43	3	0	1	0	0.71	1	0	1	1	1	0	2.34	1	1.8	1	0.77	0	52.58	1	23.7	1
0	42	0	19.6	0	0	1	0	6.6	1	0	0	-671.15	1	0	0	0	0	0	1	0	0	0	0	2.04	1	2.57	1	1.01	0	53.33	1	23.7	1
0	71	1	23.7	1	1	1	0	19	2	1	0	-643.34	1	0	0	0	0	0	1	0	0	0	1	2.43	1	3.3	1	1.22	0	41.31	1	23.7	1
1	73	0	20.6	0	1	0	0	18	2	1	0	-38.55	4	0	0	1	0.88	1	0	1	0	0	0	10.2	1	2.22	1	1.09	0	29.7	0	23.8	1
1	55	0	25.9	0	0	1	0	15	2	1	0	-419.82	2	1	0	0	0.23	0	0	1	1	1	0	1.36	0	2.54	1	1.94	1	39.4	1	23.9	1
0	54	0	21.3	0	1	0	0	21	3	0	1	-399.84	3	0	1	0	0.24	0	0	0	0	0	0	2.51	1	2.34	1	1.38	0	102	1	23.9	1
0	69	1	22.4	1	0	0	1	15	2	1	0	-635.12	1	0	0	0	0	0	0	0	1	1	0	4.28	1	1.69	0	0.99	0	48.55	1	24	1
0	48	0	22	0	0	1	0	8	1	0	0	-529.44	2	1	0	0	0	0	0	0	0	0	0	1.84	0	2.51	1	1.04	0	42	1	24	1
0	58	0	24.4	0	0	1	0	12	2	1	0	-453.67	2	1	0	0	0	0	0	0	0	1	1	1.38	0	2.15	1	0.82	0	64.9	1	24	1
1	80	1	23.6	0	0	1	0	29	3	0	1	58.85	4	0	0	1	1	1	0	0	0	1	0	5.85	1	7.83	1	1.27	0	73.8	1	24.1	1
0	59	0	19	0	0	1	0	9	1	0	0	-611.3	1	0	0	0	0	0	0	0	0	1	0	3.4	1	1.23	0	0.41	0	33.76	1	24.2	1
0	64	0	23.7	0	1	0	0	11	2	1	0	-442.01	2	1	0	0	0	0	0	0	0	0	0	1.02	0	2.69	1	0.92	0	50	1	24.3	1
1	64	1	23.9	1	1	1	1	18	2	1	0	11.86	4	0	0	1	1	1	0	0	1	0	0	11.7	1	3.06	1	0.57	0	60.17	1	24.3	1
1	56	0	25.1	0	0	0	0	9	1	0	0	-440.53	2	1	0	0	0.2	0	1	0	0	0	0	2.06	1	2.2	1	0.54	0	44.35	1	24.4	1
0	47	0	21.5	0	1	0	0	14	2	1	0	-364.57	3	0	1	0	0.26	0	0	0	0	0	1	1.31	0	1.4	0	0.78	0	41.1	1	24.4	1
0	59	0	23.4	0	0	0	0	17	2	1	0	-565.11	2	1	0	0	0	0	0	0	1	0	0	2.33	1	1.82	1	0.34	0	38.3	1	24.5	1
0	65	0	27	0	0	0	0	15	2	1	0	-707.76	1	0	0	0	0	0	0	0	0	0	0	1.66	0	3.3	1	0.62	0	34.68	1	24.6	1
0	57	0	29.7	0	0	1	0	11	2	1	0	-680.84	1	0	0	0	0	0	0	0	0	1	0	8.53	1	4.78	1	0.79	0	42.9	1	24.6	1
0	54	0	24.5	0	1	0	0	13	2	1	0	-588.38	2	1	0	0	0	0	1	0	0	0	0	1.26	0	2.45	1	0.87	0	31.16	0	24.6	1
1	69	0	25.1	0	0	1	0	26	3	0	1	-305.83	3	0	1	0	0.44	1	0	1	1	1	1	4.62	1	1.45	0	0.73	0	44.73	1	24.6	1
1	65	0	26.6	0	0	1	0	21	3	0	1	-170.91	4	0	0	1	0.82	1	0	0	1	1	1	5.25	1	1.84	1	1.11	0	26.35	0	24.7	1
0	66	1	28.8	0	1	0	0	10	1	0	0	-584.06	2	1	0	0	0	0	0	0	1	1	0	3.47	1	2.27	1	2.11	1	47	1	24.7	1
1	58	0	24.9	0	1	0	0	30	3	0	1	-123.17	4	0	0	1	0.84	1	0	1	1	1	0	3.72	1	1.4	0	1.68	1	52.53	1	24.8	1
1	62	0	27.6	0	0	0	1	12	2	1	0	-173.71	4	0	0	1	0.77	1	0	0	1	1	0	4.77	1	2.3	1	0.91	0	40.72	1	24.8	1
0	63	0	23.7	0	0	0	0	14	2	1	0	-548.35	2	1	0	0	0	0	0	0	1	1	0	2.61	1	3.27	1	0.42	0	55.7	1	24.9	1
1	65	1	26.8	1	1	0	0	17	2	1	0	8.63	4	0	0	1	1	1	0	1	1	1	0	7.26	1	4.03	1	0.74	0	75.26	1	24.9	1
0	65	1	24.9	0	0	0	0	10	1	0	0	-610.8	1	0	0	0	0	0	0	0	0	0	1	2.83	1	1.42	0	0.76	0	44.03	1	25	1
1	75	0	19.3	0	1	1	0	18	2	1	0	-330.22	3	0	1	0	0.67	1	1	1	1	1	0	4.94	1	1.96	1	2.28	1	80.31	1	25	1
1	42	1	22.4	0	0	0	0	22	3	0	1	-308.76	3	0	1	0	0.33	1	0	0	0	1	0	1.58	0	1.38	0	1.36	0	33.39	0	25	1
1	56	0	23.2	0	0	0	1	18	2	1	0	-316.24	3	0	1	0	0.45	1	0	0	1	1	0	3.02	1	1.43	0	0.54	0	29	0	25.1	1
0	70	1	24.8	1	0	1	0	16	2	1	0	-613.42	1	0	0	0	0	0	0	0	0	0	0	1.82	0	5.42	1	0.61	0	53.94	1	25.2	1
1	66	1	20.6	1	1	0	0	28	3	0	1	46.28	4	0	0	1	1	1	0	0	1	0	1	3.46	1	2.79	1	1.16	0	46.65	1	25.2	1
1	63	0	26.9	0	0	1	1	19	2	1	0	-193.66	4	0	0	1	0.8	1	0	1	1	1	0	3.43	1	1.95	1	1.39	0	55.89	1	25.2	1
0	50	0	25.3	0	0	0	0	8.9	1	0	0	-410.83	2	1	0	0	0.35	1	0	0	0	1	1	1.51	0	1.47	0	1.18	0	44.6	1	25.3	1
1	51	0	25.7	0	0	1	1	7	1	0	0	-290.17	3	0	1	0	0.66	1	0	1	1	0	0	1.15	0	1.99	1	0.88	0	62.64	1	25.3	1
0	46	0	23.7	0	0	0	0	8	1	0	0	-714.63	1	0	0	0	0	0	0	0	0	0	0	0.88	0	1.45	0	0.77	0	61.3	1	25.4	1
0	47	0	23.1	0	0	1	0	5	1	0	0	-656.74	1	0	0	0	0	0	0	0	0	0	0	1.65	0	2.16	1	0.89	0	51.08	1	25.5	1
1	62	0	29.1	0	0	0	0	25	3	0	1	-93.45	4	0	0	1	0.92	1	0	1	1	1	1	4.44	1	2.01	1	0.74	0	40.24	1	25.5	1
0	53	1	21.8	0	0	0	0	7	1	0	0	-525.31	2	1	0	0	0	0	0	0	0	1	0	1.58	0	1.74	0	1.25	0	35.3	1	25.7	1
1	70	0	23.1	0	0	0	0	18	2	1	0	-254.5	3	0	1	0	0.55	1	0	1	0	1	1	3.22	1	3.36	1	0.71	0	43.9	1	25.7	1
0	73	1	29	1	1	1	0	17	2	1	0	-490.58	2	1	0	0	0.15	0	1	1	0	1	0	2.58	1	6.41	1	1.72	1	42.19	1	25.7	1
1	49	1	22.6	1	0	0	1	7	1	0	0	-526.46	2	1	0	0	0	0	0	0	1	0	0	1.57	0	1.56	0	2.57	1	34.2	1	25.9	1
0	56	1	36.8	1	1	0	0	13	2	1	0	-503.99	2	1	0	0	0	0	0	1	0	0	0	4.33	1	3.54	1	0.74	0	35.8	1	25.9	1
0	61	0	22.1	0	0	0	1	7	1	0	0	-683.27	1	0	0	0	0	0	0	0	0	0	0	1.29	0	3.76	1	0.72	0	40.5	1	26.1	1
1	57	1	19.1	1	1	0	0	25	3	0	1	-284.87	3	0	1	0	0.46	1	1	0	1	0	0	4.41	1	5.17	1	0.83	0	25.8	0	26.1	1
0	56	0	27	0	0	1	0	10	1	0	0	-518.87	2	1	0	0	0.2	0	0	1	0	0	0	1.39	0	2.83	1	0.81	0	25.88	0	26.1	1
1	67	0	22.4	0	0	0	0	10	1	0	0	-606.11	1	0	0	0	0	0	0	1	1	0	1	1.93	0	3.09	1	0.84	0	44.57	1	26.2	1
1	70	1	25.6	0	0	0	0	18	2	1	0	-561.34	2	1	0	0	0	0	0	0	0	0	0	5.23	1	2.64	1	1.2	0	43.4	1	26.2	1
0	71	0	22.2	0	1	1	0	11	2	1	0	-358.02	3	0	1	0	0	0	0	0	1	1	0	0.99	0	2.07	1	0.85	0	53.7	1	26.2	1
1	41	1	31.4	0	0	0	1	5	1	0	0	-669.5	1	0	0	0	0	0	0	0	0	0	1	1.94	0	1.17	0	0.93	0	35.9	1	26.2	1
1	58	1	31	1	1	0	0	30	3	0	1	33.31	4	0	0	1	1	1	0	1	0	0	0	1.55	0	1.73	0	1.44	0	21.7	0	26.2	1
1	66	1	27.6	1	0	1	0	28	3	0	1	34.03	4	0	0	1	1	1	0	1	1	1	0	5.94	1	7.71	1	2.31	1	37.43	1	26.2	1
1	55	0	25	0	0	0	0	25	3	0	1	15.68	4	0	0	1	1	1	0	1	1	1	1	2.05	1	2.81	1	0.82	0	41.8	1	26.3	1
0	62	0	28.2	0	0	0	0	20	2	1	0	-337.29	3	0	1	0	0.4	1	0	0	1	1	0	2.14	1	2.22	1	0.34	0	29.79	0	26.3	1
0	50	1	24.3	0	0	0	0	12	2	1	0	-489.57	2	1	0	0	0.19	0	0	0	0	1	0	1.54	0	1.27	0	0.63	0	26.13	0	26.3	1
1	76	1	27	1	1	1	0	11	2	1	0	-365.06	3	0	1	0	0.29	1	1	0	0	0	0	10.9	1	2.43	1	2	1	33.7	1	26.3	1
1	58	0	30	0	0	0	1	28	3	0	1	21.52	4	0	0	1	1	1	1	1	1	1	1	14.3	1	1.58	0	0.49	0	45.54	1	26.3	1
1	63	1	17.5	1	0	1	1	22	3	0	1	-111.89	4	0	0	1	0.87	1	0	0	1	1	1	14.2	1	5.54	1	2.6	1	64.4	1	26.5	1
1	68	0	27.1	0	0	1	0	27	3	0	1	17.57	4	0	0	1	1	1	0	1	1	1	1	1.2	0	3.87	1	0.4	0	64.55	1	26.5	1
1	66	0	23.5	0	1	0	0	12	2	1	0	-125.08	4	0	0	1	0.75	1	0	1	1	0	1	2.53	1	5.94	1	0.62	0	51.68	1	26.6	1
0	54	0	23.6	0	0	0	0	6	1	0	0	-688.44	1	0	0	0	0	0	1	0	0	0	0	1.52	0	2.44	1	1.11	0	58.95	1	26.7	1
1	76	0	28.4	0	1	0	0	10	1	0	0	-418.79	2	1	0	0	0.24	0	0	0	0	0	0	3.38	1	1.7	0	1.07	0	33.2	0	26.7	1
1	54	1	27.8	1	0	0	0	11	2	1	0	-276.94	3	0	1	0	0.56	1	0	0	1	1	0	5.01	1	1.24	0	1.06	0	26.18	0	26.9	1
0	41	0	23.5	0	0	1	1	9	1	0	0	-638.66	1	0	0	0	0	0	0	0	0	0	0	0.89	0	1.07	0	1.61	0	42	1	27	1
0	58	1	19.4	1	0	0	0	30	3	0	1	-403.86	2	1	0	0	0.29	1	0	1	0	0	1	4.1	1	1.22	0	0.65	0	44.4	1	27.1	1
1	63	1	26.6	1	0	0	0	28	3	0	1	-566.74	2	1	0	0	0	0	0	1	1	1	0	4.86	1	1.92	1	2.21	1	40.34	1	27.2	1
0	64	0	22.7	0	0	0	0	20	2	1	0	-413.72	2	1	0	0	0.21	0	0	0	1	1	1	2.22	1	0.88	0	0.61	0	50.2	1	27.5	1
0	42	0	27.7	0	0	0	0	12	2	1	0	-457.41	2	1	0	0	0.24	0	1	1	0	0	0	2.35	1	1.25	0	1	0	35.7	1	27.5	1
0	63	1	25.3	0	0	0	0	11	2	1	0	-670.24	1	0	0	0	0	0	0	0	0	0	1	4.73	1	2.59	1	1.36	0	51.6	1	27.6	1
1	53	0	26.2	0	0	1	0	15	2	1	0	-18.7	4	0	0	1	1	1	1	0	1	1	0	1.14	0	1.41	0	1.03	0	43.24	1	27.6	1
1	42	0	22.9	0	0	0	1	16	2	1	0	-212.28	3	0	1	0	0.75	1	1	0	1	0	0	1.2	0	2.11	1	0.59	0	19.16	0	27.6	1
0	40	1	30.9	0	0	0	1	8	1	0	0	-564.62	2	1	0	0	0	0	0	0	0	0	0	4.34	1	1.66	0	1.57	0	34.01	1	27.7	1
1	77	1	23.4	1	1	1	1	13	2	1	0	-150.32	4	0	0	1	0.77	1	0	1	1	0	1	3.41	1	2.78	1	1.4	0	45.6	1	27.8	1
0	56	0	25.8	0	0	0	0	10.3	2	1	0	-624.14	1	0	0	0	0	0	0	0	1	0	0	1.27	0	1.44	0	0.65	0	51.08	1	27.9	1
1	63	1	24	0	0	0	0	19	2	1	0	18.34	4	0	0	1	1	1	1	1	0	1	0	1.51	0	1.74	0	1.67	1	40.94	1	28.1	1
0	73	1	27.3	0	0	1	0	10	1	0	0	-676.09	1	0	0	0	0	0	0	0	0	0	0	3.42	1	1.31	0	0.81	0	39.6	1	28.1	1
0	72	1	23.8	1	1	1	1	10	1	0	0	-169.11	4	0	0	1	0.82	1	0	0	1	0	1	3.21	1	1.89	1	0.77	0	40.94	1	28.2	1
0	73	0	27.5	0	0	0	0	14	2	1	0	-530.91	2	1	0	0	0	0	0	0	0	1	1	2.95	1	1.51	0	0.96	0	54.1	1	28.5	1
0	54	0	28	0	0	1	0	17	2	1	0	-634.34	1	0	0	0	0	0	1	0	0	1	0	1.22	0	1.29	0	0.92	0	42.47	1	28.7	1
0	53	0	21.7	0	0	1	1	10	1	0	0	-691.82	1	0	0	0	0	0	0	0	0	1	0	0.63	0	1.48	0	0.74	0	43.8	1	28.8	1
0	66	0	20.3	1	0	0	0	11	2	1	0	-315.83	3	0	1	0	0.37	1	0	1	1	0	1	2.81	1	1.5	0	0.52	0	27.97	0	28.9	1
1	69	0	26.8	0	0	0	0	14	2	1	0	-111.05	4	0	0	1	0.84	1	0	0	1	1	0	3.54	1	0.95	0	0.68	0	28.73	0	29	1
0	38	1	28.4	1	0	0	0	8	1	0	0	-629.07	1	0	0	0	0	0	0	0	1	1	0	1.95	0	1.45	0	1.1	0	18.34	0	29.2	1
0	58	1	25.2	1	0	0	1	14	2	1	0	-568.41	2	1	0	0	0	0	0	0	1	0	0	3.26	1	2.4	1	0.84	0	46.04	1	29.3	1
1	54	0	22.9	0	0	0	0	18	2	1	0	39.97	4	0	0	1	1	1	0	0	1	1	0	1.22	0	1.33	0	0.79	0	19.1	0	29.3	1
0	52	1	22.9	1	1	0	0	13	2	1	0	-581.14	2	1	0	0	0	0	1	0	0	0	0	4.74	1	1.46	0	1.68	1	70.49	1	29.4	1
0	76	0	29.3	0	0	1	0	25	3	0	1	-374.59	3	0	1	0	0.25	0	1	0	1	1	0	3.16	1	2.09	1	0.82	0	58.03	1	29.4	1
1	63	0	24.1	0	0	0	0	14	2	1	0	32.08	4	0	0	1	1	1	0	1	1	1	1	6.75	1	2.8	1	1.1	0	34.12	1	29.5	1
1	33	1	24.8	1	0	0	0	14	2	1	0	-597.37	2	1	0	0	0	0	0	0	1	1	0	1.07	0	1.35	0	1.84	1	45.25	1	29.7	1
0	53	0	20.6	0	0	0	1	23	3	0	1	-579.72	2	1	0	0	0.11	0	0	0	0	0	0	2.61	1	2.65	1	1.86	1	41.7	1	29.8	1
0	30	0	24.8	0	0	0	0	10	1	0	0	-527.38	2	1	0	0	0	0	0	0	0	0	0	1.23	0	1.27	0	1.97	1	47.86	1	30	1
0	65	0	27.2	0	1	1	1	23	3	0	1	-643.26	1	0	0	0	0	0	0	0	1	1	0	2.09	1	1.11	0	0.53	0	28	0	30	1
0	64	1	22.3	0	0	0	1	23	3	0	1	-425.69	2	1	0	0	0.25	0	1	0	0	0	1	1.01	0	2.47	1	1.58	0	47.1	1	30.1	1
0	56	1	25.1	0	1	1	1	7	1	0	0	-611.51	1	0	0	0	0	0	0	0	0	0	0	2.18	1	1.18	0	1.06	0	43.5	1	30.4	1
0	60	1	27.7	1	0	0	0	18	2	1	0	-705.23	1	0	0	0	0	0	0	1	0	1	0	2.47	1	3.89	1	3.09	1	31.91	0	30.4	1
0	58	0	32	0	0	0	1	20	2	1	0	16.08	4	0	0	1	1	1	1	1	0	0	1	0.41	0	1.78	0	0.89	0	78.37	1	30.6	1
0	49	1	25.3	0	0	0	0	13	2	1	0	-407.74	2	1	0	0	0.26	0	1	1	1	0	0	1.86	0	1.07	0	1.25	0	44.34	1	30.7	1
0	51	0	30.4	0	0	1	0	8	1	0	0	-544.06	2	1	0	0	0	0	0	0	0	0	0	1.55	0	2.94	1	0.72	0	49.4	1	30.7	1
1	55	1	20.3	1	1	1	0	25	3	0	1	-108.82	4	0	0	1	0.78	1	0	0	1	1	0	5.15	1	2.26	1	2.29	1	37.13	1	30.9	1
1	68	0	19.5	0	0	0	0	20	2	1	0	-377.73	3	0	1	0	0.33	1	1	0	1	1	0	2.97	1	2.8	1	0.33	0	45.12	1	30.9	1
1	68	0	23.1	0	1	0	0	21	3	0	1	-400.63	2	1	0	0	0.25	0	0	0	0	1	1	3.33	1	1.97	1	0.86	0	30.34	0	31	1
1	50	0	25.4	0	0	1	0	15	2	1	0	-272.23	3	0	1	0	0	0	1	0	0	0	1	1.42	0	1.84	1	0.99	0	33.11	0	31.2	1
1	65	1	24.8	0	1	0	0	15	2	1	0	-192.96	4	0	0	1	0.83	1	1	0	1	1	1	1.55	0	3.14	1	0.53	0	35.4	1	31.2	1
0	68	0	26.9	0	1	0	0	14	2	1	0	-462.42	2	1	0	0	0.2	0	0	0	0	1	0	0.67	0	3.1	1	0.65	0	43.4	1	31.4	1
0	60	1	25.6	0	1	1	0	12	2	1	0	-769.96	1	0	0	0	0	0	0	0	0	0	0	3.3	1	2.52	1	1.44	0	49.5	1	31.8	1
0	65	0	27.6	0	0	1	1	15.3	2	1	0	-520.34	2	1	0	0	0	0	1	0	1	1	1	2.68	1	2.5	1	0.94	0	13.5	0	32.1	1
1	48	1	27	0	0	0	0	18	2	1	0	-41.37	4	0	0	1	0.89	1	0	1	0	1	1	1.47	0	4.24	1	1.57	0	50.2	1	32.4	1
0	54	1	29.3	0	0	1	0	12.8	2	1	0	-708.5	1	0	0	0	0	0	0	0	0	1	0	0.63	0	1.96	1	2.29	1	45.1	1	32.4	1
0	37	1	24.2	0	0	0	0	12	2	1	0	-545.55	2	1	0	0	0	0	0	0	0	0	0	1.92	0	0.98	0	0.77	0	35.26	1	32.6	1
0	49	0	21.1	0	0	1	0	11	2	1	0	-659.58	1	0	0	0	0	0	0	0	0	0	0	1.02	0	1.95	1	1.42	0	42.82	1	32.8	1
0	44	1	26.3	1	0	1	1	9	1	0	0	-632.7	1	0	0	0	0	0	0	0	0	1	0	3.16	1	2.79	1	1.14	0	40.32	1	33	1
0	59	1	27.9	0	0	0	0	17	2	1	0	-602.3	1	0	0	0	0	0	0	0	0	0	0	1.72	0	2.57	1	1.56	0	34.8	1	33.2	1
0	60	0	24.7	0	0	0	0	23	3	0	1	-705.42	1	0	0	0	0	0	0	0	1	0	0	1.95	0	1.26	0	0.67	0	33.95	1	33.5	1
1	59	0	25.7	0	0	0	0	6	1	0	0	-291.67	3	0	1	0	0.7	1	0	0	1	1	1	1.86	0	1.13	0	0.28	0	33.95	1	33.7	1
0	49	1	25.8	0	0	0	0	7	1	0	0	-635.61	1	0	0	0	0	0	1	0	0	0	0	0.91	0	2.2	1	1.13	0	37.87	1	34	1
1	70	0	31.6	0	0	1	0	27	3	0	1	-138.51	4	0	0	1	0.42	1	0	1	1	0	0	2.36	1	2.12	1	1.07	0	57.28	1	34.3	1
0	59	0	23.4	0	1	1	0	19	2	1	0	-556.53	2	1	0	0	0	0	0	1	0	1	0	2.38	1	1.38	0	0.72	0	48.85	1	34.5	1
1	50	1	25.8	0	0	1	1	14	2	1	0	-187.87	4	0	0	1	0.75	1	0	0	0	0	1	0.88	0	1.21	0	0.86	0	34.5	1	34.7	1
0	50	1	30.2	0	0	0	0	12	2	1	0	-689.1	1	0	0	0	0	0	0	0	0	0	0	1.12	0	0.5	0	0.98	0	29.8	0	35	1
1	40	1	31	1	0	0	0	11	2	1	0	-106.86	4	0	0	1	0.81	1	0	1	0	0	0	3.49	1	2.93	1	1.03	0	29.04	0	35.1	1
1	70	0	26.2	0	0	0	0	28	3	0	1	-216.11	3	0	1	0	0.47	1	0	1	1	1	1	1.4	0	1.81	1	0.43	0	37.3	1	35.3	1
0	67	0	26	0	0	1	0	15	2	1	0	-559.75	2	1	0	0	0.09	0	0	0	1	0	0	3.31	1	2.11	1	0.47	0	53.91	1	35.4	1
0	64	1	25.8	0	0	0	0	11	2	1	0	-559.96	2	1	0	0	0	0	1	0	0	1	1	1.44	0	1.23	0	1.45	0	36.6	1	36.2	1
1	56	0	25.1	0	0	0	0	21	3	0	1	-563.65	2	1	0	0	0	0	0	1	0	0	0	2.22	1	1.26	0	0.83	0	38.14	1	37.2	1
0	65	0	25.2	0	0	0	0	10	1	0	0	-569.57	2	1	0	0	0	0	1	0	1	1	0	3.48	1	2.55	1	0.89	0	32.4	0	37.5	1
1	56	1	25.7	1	0	1	0	30	3	0	1	48.95	4	0	0	1	1	1	0	1	0	1	0	4.72	1	1.53	0	1.17	0	50.98	1	37.6	1
1	61	0	23	0	0	1	0	24	3	0	1	-283.66	3	0	1	0	0.44	1	0	1	1	1	1	1.84	0	1.94	1	0.35	0	22.86	0	38.3	1
0	63	1	20.3	0	0	0	0	8	1	0	0	-690.26	1	0	0	0	0	0	0	0	1	0	0	2.59	1	2.59	1	1.46	0	53.85	1	38.6	1
0	67	1	28.6	0	0	0	0	8	1	0	0	-693.22	1	0	0	0	0	0	0	0	0	0	0	1.64	0	1.5	0	0.81	0	28.55	0	39.2	1
0	40	0	22.1	0	0	1	1	6	1	0	0	-708.92	1	0	0	0	0	0	1	0	0	0	0	1.31	0	2.17	1	1.25	0	22.6	0	39.5	1
0	69	1	28	1	1	1	1	14	2	1	0	-672.76	1	0	0	0	0	0	0	0	1	0	0	1.95	0	3	1	0.99	0	57.94	1	39.8	1
1	78	0	22.5	1	1	1	0	7.5	1	0	0	-149.82	4	0	0	1	0.78	1	0	1	1	1	0	2.29	1	1.5	0	0.6	0	52.89	1	40.1	1
1	50	0	24.4	0	0	1	0	28	3	0	1	-173.07	4	0	0	1	0.83	1	1	1	0	1	1	2.98	1	1.33	0	0.73	0	25.67	0	40.8	1
0	58	1	27.3	1	0	0	1	11	2	1	0	-695.17	1	0	0	0	0	0	0	0	0	0	0	2.76	1	2.69	1	0.67	0	37.3	1	42	1
1	49	1	21.4	0	0	0	1	23	3	0	1	43.01	4	0	0	1	1	1	0	1	1	1	0	9.77	1	1.34	0	3.6	1	56.92	1	42.9	1
0	67	1	22.8	1	1	1	0	10	1	0	0	-534.87	2	1	0	0	0.2	0	0	0	1	1	0	3.41	1	2.27	1	1.73	1	42.83	1	44.1	1
1	65	1	21.9	1	0	1	0	11	2	1	0	23.26	4	0	0	1	1	1	0	0	1	1	1	2.4	1	1.78	0	1.86	1	74.6	1	46.3	1
1	52	1	24.5	0	0	0	0	20	2	1	0	-403.87	2	1	0	0	0.31	1	0	1	1	1	0	5.05	1	0.71	0	1.71	1	32.72	0	46.9	1
0	57	0	24.4	0	0	0	0	12	2	1	0	-447.47	2	1	0	0	0	0	0	0	0	1	0	1.43	0	3.66	1	0.25	0	48.49	1	47.5	1
1	52	1	23	0	1	1	1	15	2	1	0	-418.66	2	1	0	0	0.2	0	0	0	1	0	0	1.68	0	2.99	1	1.58	0	41.6	1	49.3	1
0	53	0	27.7	0	0	0	0	7	1	0	0	-562.15	2	1	0	0	0	0	0	0	0	1	0	1.91	0	0.99	0	0.502	0	27.47	0	58.6	1
0	55	1	28.7	0	0	0	0	6	1	0	0	-583.09	2	1	0	0	0	0	0	0	0	0	0	1.77	0	2.19	1	1.31	0	35.98	1	61	1
1	70	1	23.8	1	1	1	0	11	2	1	0	-337.7	3	0	1	0	0.44	1	0	0	0	0	0	1.26	0	5.71	1	0.59	0	49.4	1	69.8	1
1	52	0	23.5	0	0	0	0	21	3	0	1	-106.97	4	0	0	1	0.82	1	0	1	1	1	1	1.56	0	2.33	1	0.7	0	23.75	0	81.6	1
